# Supplementary material for: LINflow: a computational pipeline that combines an alignment-free with an alignment-based method to accelerate generation of similarity matrices for prokaryotic genomes
Source: PeerJ. 2021 Mar 24;9:e10906. doi: 10.7717/peerj.10906 (PMC8000461; doi:10.7717/peerj.10906)
Supplement: Supplemental Information 5 — Genomes of data set A, B, C, D and E and their LINs assigned by LINflow are listed in the Table S1 tab. Cophenetic correlations of hierarchical clustering dendrograms based on similarity matrices generated by different software are listed in the Table S2 tab. [file peerj-09-10906-s005.xlsx]

## Sheet: Supplementary Table 1
Supplementary Table 1. Genomes of data set A, B, C, D and E and their LINs assigned by LINflow
Data set	Accession	Genus	Species	Strain	LIN
A	AAKV01000001.1	Pseudomonas	aeruginosa	str. C3719	0,0,0,0,0,0,0,0,0,0,0,0,0,0,0,0,0,0,0,0
	AAQW01000001.1	Pseudomonas	aeruginosa	PACS2	0,0,0,0,0,0,0,0,0,0,0,1,0,0,0,0,0,0,0,0
	ALBV02000001.1	Pseudomonas	aeruginosa	N002	0,0,0,0,0,0,0,0,0,0,0,1,1,0,0,0,0,0,0,0
	AXOT01000001.1	Pseudomonas	aeruginosa	C40	0,0,0,0,0,0,0,0,0,0,0,1,10,0,0,0,0,0,0,0
	AXOU01000001.1	Pseudomonas	aeruginosa	C23	0,0,0,0,0,0,0,0,0,0,0,1,11,0,0,0,0,0,0,0
	AXOV01000001.1	Pseudomonas	aeruginosa	C20	0,0,0,0,0,0,0,0,0,0,0,1,11,0,0,0,0,0,0,1
	AXOX01000001.1	Pseudomonas	aeruginosa	M8A.4	0,0,0,0,0,0,0,0,0,0,0,1,12,0,0,0,0,0,0,0
	AXPA01000001.1	Pseudomonas	aeruginosa	M8A.1	0,0,0,0,0,0,0,0,0,0,0,1,13,0,0,0,0,0,0,0
	ALBW01000001.1	Pseudomonas	aeruginosa	MRW44.1	0,0,0,0,0,0,0,0,0,0,0,1,2,0,0,0,0,0,0,0
	ALIO01000001.1	Pseudomonas	aeruginosa	DQ8	0,0,0,0,0,0,0,0,0,0,0,1,2,1,0,0,0,0,0,0
	APMD01000001.1	Pseudomonas	aeruginosa	PA45	0,0,0,0,0,0,0,0,0,0,0,1,3,0,0,0,0,0,0,0
	ASQT01000001.1	Pseudomonas	aeruginosa	str. C 1334	0,0,0,0,0,0,0,0,0,0,0,1,4,0,0,0,0,0,0,0
	ASQW01000001.1	Pseudomonas	aeruginosa	str. PA 62	0,0,0,0,0,0,0,0,0,0,0,1,5,0,0,0,0,0,0,0
	ASRD01000001.1	Pseudomonas	aeruginosa	str. C 1426,	0,0,0,0,0,0,0,0,0,0,0,1,6,0,0,0,0,0,0,0
	ASWU01000001.1	Pseudomonas	aeruginosa	PAK	0,0,0,0,0,0,0,0,0,0,0,1,7,0,0,0,0,0,0,0
	ASWW01000001.1	Pseudomonas	aeruginosa	MSH-10	0,0,0,0,0,0,0,0,0,0,0,1,8,0,0,0,0,0,0,0
	AXOR01000001.1	Pseudomonas	aeruginosa	C48	0,0,0,0,0,0,0,0,0,0,0,1,9,0,0,0,0,0,0,0
	AXOY01000001.1	Pseudomonas	aeruginosa	M8A.3	0,0,0,0,0,0,0,0,0,0,0,1,9,1,0,0,0,0,0,0
	AXOZ01000001.1	Pseudomonas	aeruginosa	M8A.2	0,0,0,0,0,0,0,0,0,0,0,1,9,1,0,0,0,0,1,0
	AEVV03000001.1	Pseudomonas	aeruginosa	138244	0,0,0,0,0,0,0,0,0,0,0,2,0,0,0,0,0,0,0,0
	AFXI01000001.1	Pseudomonas	aeruginosa	9BR	0,0,0,0,0,0,0,0,0,0,0,3,0,0,0,0,0,0,0,0
	AFXJ01000001.1	Pseudomonas	aeruginosa	19BR	0,0,0,0,0,0,0,0,0,0,0,3,0,0,0,0,0,1,0,0
	AFXK01000001.1	Pseudomonas	aeruginosa	213BR	0,0,0,0,0,0,0,0,0,0,0,3,0,0,0,0,1,0,0,0
	ASQO01000001.1	Pseudomonas	aeruginosa	PGPR2	0,0,0,0,0,0,0,0,0,0,0,3,1,0,0,0,0,0,0,0
	AXON01000001.1	Pseudomonas	aeruginosa	CF614	0,0,0,0,0,0,0,0,0,0,0,3,1,1,0,0,0,0,0,0
	AJKG01000001.1	Pseudomonas	aeruginosa	LCT-PA102	0,0,0,0,0,0,0,0,0,0,0,4,0,0,0,0,0,0,0,0
	ATJT01000001.1	Pseudomonas	aeruginosa	LCT-PA220	0,0,0,0,0,0,0,0,0,0,0,4,0,0,0,0,0,0,1,0
	ATJU01000001.1	Pseudomonas	aeruginosa	LCT-PA41	0,0,0,0,0,0,0,0,0,0,0,4,0,0,0,0,0,0,2,0
	ALJH01000001.1	Pseudomonas	aeruginosa	AH16	0,0,0,0,0,0,0,0,0,0,0,4,0,0,0,0,0,1,0,0
	AXOO01000001.1	Pseudomonas	aeruginosa	CF77	0,0,0,0,0,0,0,0,0,0,0,4,0,1,0,0,0,0,0,0
	ASQS01000001.1	Pseudomonas	aeruginosa	str. C 763	0,0,0,0,0,0,0,0,0,0,0,4,1,0,0,0,0,0,0,0
	AXOP01000001.1	Pseudomonas	aeruginosa	C52	0,0,0,0,0,0,0,0,0,0,0,4,1,0,1,0,0,0,0,0
	AXOQ01000001.1	Pseudomonas	aeruginosa	C51	0,0,0,0,0,0,0,0,0,0,0,4,1,0,2,0,0,0,0,0
	AXRD01000001.1	Pseudomonas	aeruginosa	S35004	0,0,0,0,0,0,0,0,0,0,0,4,1,0,4,0,0,0,0,0
	AXOS01000001.1	Pseudomonas	aeruginosa	C41	0,0,0,0,0,0,0,0,0,0,0,4,2,0,0,0,0,0,0,0
	AQHM01000001.1	Pseudomonas	aeruginosa	VRFPA02	0,0,0,0,0,0,0,0,0,0,0,5,0,0,0,0,0,0,0,0
	AXOW01000001.1	Pseudomonas	aeruginosa	M9A.1	0,0,0,0,0,0,0,0,0,0,0,6,0,0,0,0,0,0,0,0
	AAKW01000001.1	Pseudomonas	aeruginosa	2192	0,0,0,0,0,0,0,0,0,0,1,0,0,0,0,0,0,0,0,0
	ATAQ01000001.1	Pseudomonas	aeruginosa	WC55	0,0,0,0,0,0,0,0,0,0,1,0,1,0,0,0,0,0,0,0
	ABKZ01000001.1	Pseudomonas	aeruginosa	PAb1	0,0,0,0,0,0,0,0,0,0,2,0,0,0,0,0,0,0,0,0
	AEVW03000001.1	Pseudomonas	aeruginosa	HB15	0,0,0,0,0,0,0,0,0,0,2,0,0,0,1,0,0,0,0,0
	ASWV01000001.1	Pseudomonas	aeruginosa	PA14	0,0,0,0,0,0,0,0,0,0,2,0,1,0,0,0,0,0,0,0
	AXRC01000001.1	Pseudomonas	aeruginosa	X13273	0,0,0,0,0,0,0,0,0,0,2,0,3,1,0,0,0,0,0,0
	AEEX01000001.1	Pseudomonas	aeruginosa	39016	0,0,0,0,0,0,0,0,0,0,2,1,0,0,0,0,0,0,0,0
	ASQV01000001.1	Pseudomonas	aeruginosa	str. E 2	0,0,0,0,0,0,0,0,0,0,2,1,0,0,1,0,0,0,0,0
	AXRG01000001.1	Pseudomonas	aeruginosa	U2504	0,0,0,0,0,0,0,0,0,0,2,1,0,4,0,0,0,0,0,0
	ALPS01000001.1	Pseudomonas	aeruginosa	PABL056	0,0,0,0,0,0,0,0,0,0,2,2,0,0,0,0,0,0,0,0
	AWWZ01000001.1	Pseudomonas	aeruginosa	VRFPA04	0,0,0,0,0,0,0,0,0,0,2,3,0,0,0,0,0,0,0,0
	AQFN01000001.1	Pseudomonas	aeruginosa	str. Stone 130	0,0,0,0,0,0,0,0,0,0,3,0,0,0,0,0,0,0,0,0
	ATNK01000001.1	Pseudomonas	aeruginosa	VRFPA03	0,0,0,0,0,0,0,0,0,0,4,0,0,0,0,0,0,0,0,0
	ATCP01000001.1	Pseudomonas	alcaligenes	OT 69	0,0,0,2,0,0,0,0,0,0,0,0,0,0,0,0,0,0,0,0
	BATO01000001.1	Pseudomonas	alcaligenes	MRY13-0052	0,0,0,2,0,0,0,0,0,0,1,0,0,0,0,0,0,0,0,0
	AUIE01000001.1	Pseudomonas	resinovorans	DSM 21078	0,0,0,3,0,0,0,0,0,0,0,0,0,0,0,0,0,0,0,0
	NC_021499.1	Pseudomonas	resinovorans	NBRC 106553 DNA	0,0,0,3,1,0,0,0,0,0,0,0,0,0,0,0,0,0,0,0
	AJMR01000001.1	Pseudomonas	pseudoalcaligenes	KF707	0,0,0,3,2,0,0,0,0,0,0,0,0,0,0,0,0,0,0,0
	AZRU01000001.1	Pseudomonas	nitroreducens	HBP1	0,0,0,4,0,0,0,0,0,0,0,0,0,0,0,0,0,0,0,0
	AMZB01000001.1	Pseudomonas	sp.	TX1	0,0,0,4,0,1,0,0,0,0,0,0,0,0,0,0,0,0,0,0
	NC_020829.1	Pseudomonas	denitrificans	ATCC 13867,	0,0,0,4,1,0,0,0,0,0,0,0,0,0,0,0,0,0,0,0
	AZUT01000001.1	Pseudomonas	thermotolerans	J53	0,0,0,5,0,0,0,0,0,0,0,0,0,0,0,0,0,0,0,0
	BATI01000001.1	Pseudomonas	alcaligenes	NBRC 14159	0,0,0,6,0,0,0,0,0,0,0,0,0,0,0,0,0,0,0,0
	ACXS01000001.1	Pseudomonas	syringae	str. NCPPB 3681	0,0,1,0,0,0,0,0,0,0,0,0,0,0,0,0,0,0,0,0
	ACXT01000001.1	Pseudomonas	syringae	str. 2250	0,0,1,0,0,0,0,0,0,0,0,0,0,1,0,0,0,0,0,0
	ADMI02000001.1	Pseudomonas	savastanoi	NCPPB 3335	0,0,1,0,0,0,0,0,0,1,0,0,0,0,0,0,0,0,0,0
	AEAF01000001.1	Pseudomonas	syringae	str. M301315	0,0,1,0,0,0,0,0,1,0,0,0,0,0,0,0,0,0,0,0
	AJXI01000001.1	Pseudomonas	syringae	str. 6605	0,0,1,0,0,0,0,0,1,0,1,0,0,0,0,0,0,0,0,0
	NC_005773.3	Pseudomonas	syringae	1448A	0,0,1,0,0,0,0,0,1,1,0,0,0,0,0,0,0,0,0,0
	AEGG01000001.1	Pseudomonas	syringae	str. B076	0,0,1,0,0,0,0,0,1,1,0,0,1,0,0,0,0,0,0,0
	AEGH01000001.1	Pseudomonas	syringae	str. race 4	0,0,1,0,0,0,0,0,1,1,0,0,1,0,1,0,0,0,0,0
	ADFY01000001.1	Pseudomonas	syringae	K40	0,0,1,0,1,0,0,0,0,0,0,0,0,0,0,0,0,0,0,0
	ADGA01000001.1	Pseudomonas	syringae	NCPPB 1108	0,0,1,0,1,0,0,0,0,0,0,0,0,0,1,0,0,0,0,0
	ABSM01000001.1	Pseudomonas	syringae	T1	0,0,1,0,1,0,0,0,0,0,0,0,0,0,2,0,0,0,0,0
	AEAM01000001.1	Pseudomonas	syringae	str. M302278	0,0,1,0,1,0,0,0,0,0,1,0,0,0,0,0,0,0,0,0
	NC_004578.1	Pseudomonas	syringae	str. DC3000	0,0,1,0,1,0,0,0,0,0,1,1,0,0,0,0,0,0,0,0
	AVED02000001.1	Pseudomonas	syringae	CC1630	0,0,1,0,1,0,0,0,0,0,2,0,0,0,0,0,0,0,0,0
	AEAE01000001.1	Pseudomonas	syringae	str. M302280	0,0,1,0,1,0,1,0,0,0,0,0,0,0,0,0,0,0,0,0
	AEAL01000001.1	Pseudomonas	syringae	str. M302091	0,0,1,0,1,0,1,0,1,0,0,0,0,0,0,0,0,0,0,0
	AFTF01000001.1	Pseudomonas	syringae	str. NCPPB 3871	0,0,1,0,1,0,1,0,1,0,0,0,0,0,0,1,0,0,0,0
	AFTH01000001.1	Pseudomonas	syringae	str. NCPPB 3739	0,0,1,0,1,0,1,0,1,0,0,0,0,0,0,1,0,1,0,0
	AGNP01000001.1	Pseudomonas	syringae	KW41	0,0,1,0,1,0,1,0,1,0,0,0,0,0,0,1,0,2,0,0
	ANJB01000001.1	Pseudomonas	syringae	ICMP 9853	0,0,1,0,1,0,1,0,1,0,0,0,0,0,0,1,1,0,0,0
	AGNQ01000001.1	Pseudomonas	syringae	PA459	0,0,1,0,1,0,1,0,1,0,0,0,0,0,1,0,0,0,0,0
	AOJQ01000001.1	Pseudomonas	syringae	ICMP 19103	0,0,1,0,1,0,1,0,1,0,0,0,0,0,2,0,0,0,0,0
	AOJX01000002.1	Pseudomonas	syringae	ICMP 19068	0,0,1,0,1,0,1,0,1,0,0,0,0,0,3,0,0,0,0,0
	AOJZ01000001.1	Pseudomonas	syringae	ICMP 19104	0,0,1,0,1,0,1,0,1,0,0,0,0,0,4,0,0,0,0,0
	AOKA01000001.1	Pseudomonas	syringae	ICMP 19102	0,0,1,0,1,0,1,0,1,0,0,0,0,0,5,0,0,0,0,0
	AGNO01000001.1	Pseudomonas	syringae	CFBP 7286	0,0,1,0,1,0,1,0,1,0,0,0,1,0,0,0,0,0,0,0
	ANGD01000001.1	Pseudomonas	syringae	ICMP 18744	0,0,1,0,1,0,1,0,1,0,0,0,1,0,0,0,1,0,0,0
	ANJK01000001.1	Pseudomonas	syringae	ICMP 19455	0,0,1,0,1,0,1,0,1,0,0,0,1,0,0,0,2,0,0,0
	ANJM01000001.1	Pseudomonas	syringae	ICMP 19439	0,0,1,0,1,0,1,0,1,0,0,0,1,0,0,0,2,0,1,0
	AGUH01000001.1	Pseudomonas	syringae	CH2010-6	0,0,1,0,1,0,1,0,1,0,0,0,1,0,1,0,0,0,0,0
	AOKN01000001.1	Pseudomonas	syringae	ICMP 19097	0,0,1,0,1,0,1,0,1,0,0,0,1,0,1,0,1,0,0,0
	ANJD01000001.1	Pseudomonas	syringae	ICMP 18800	0,0,1,0,1,0,1,0,1,0,0,0,1,0,1,0,2,0,0,0
	ANJH01000001.1	Pseudomonas	syringae	TP6-1	0,0,1,0,1,0,1,0,1,0,0,0,1,0,1,0,2,0,0,1
	ANJG01000001.1	Pseudomonas	syringae	TP1	0,0,1,0,1,0,1,0,1,0,0,0,1,0,1,0,2,0,1,0
	AOKQ01000001.1	Pseudomonas	syringae	ICMP 18801	0,0,1,0,1,0,1,0,1,0,0,0,1,0,2,0,0,0,0,0
	ANJI02000001.1	Pseudomonas	syringae	str. Shaanxi_M228	0,0,1,0,1,0,1,0,1,0,0,0,1,1,0,0,0,0,0,0
	AOJR01000001.1	Pseudomonas	syringae	ICMP 19073	0,0,1,0,1,0,1,0,1,0,0,0,2,0,0,0,0,0,0,0
	AOJS01000001.1	Pseudomonas	syringae	ICMP 19071	0,0,1,0,1,0,1,0,1,0,0,0,2,1,0,0,0,0,0,0
	AOJW01000001.1	Pseudomonas	syringae	ICMP 19072	0,0,1,0,1,0,1,0,1,0,0,0,2,1,1,0,0,0,0,0
	AOJV01000001.1	Pseudomonas	syringae	ICMP 3923	0,0,1,0,1,0,1,0,1,0,1,0,0,0,0,0,0,0,0,0
	ATDJ01000001.1	Pseudomonas	syringae	NCPPB 2598	0,0,1,0,1,0,1,0,1,0,1,0,0,0,0,1,0,0,0,0
	AOKC01000001.1	Pseudomonas	syringae	ICMP 19100	0,0,1,0,1,0,1,0,2,0,0,0,0,0,0,0,0,0,0,0
	AOKD01000001.1	Pseudomonas	syringae	ICMP 19099	0,0,1,0,1,0,1,0,2,0,0,0,0,0,1,0,0,0,0,0
	AOKE01000001.1	Pseudomonas	syringae	ICMP 19098	0,0,1,0,1,0,1,0,2,0,0,0,0,0,2,0,0,0,0,0
	AOKH01000001.1	Pseudomonas	syringae	ICMP 18883	0,0,1,0,1,0,1,0,2,0,0,0,0,0,3,0,0,0,0,0
	AOKI01000001.1	Pseudomonas	syringae	ICMP 19095	0,0,1,0,1,0,1,0,2,0,0,0,0,0,4,0,0,0,0,0
	AOKJ01000002.1	Pseudomonas	syringae	ICMP 19094	0,0,1,0,1,0,1,0,2,0,0,0,0,0,5,0,0,0,0,0
	ANJE01000001.1	Pseudomonas	syringae	ICMP 18804	0,0,1,0,1,0,1,0,2,0,0,0,0,0,6,0,0,0,0,0
	ANJF01000001.1	Pseudomonas	syringae	ICMP 18806	0,0,1,0,1,0,1,0,2,0,0,0,0,0,6,0,0,0,1,0
	ANJL01000001.1	Pseudomonas	syringae	ICMP 18807	0,0,1,0,1,0,1,0,2,0,1,0,0,0,0,0,0,0,0,0
	ATDK01000001.1	Pseudomonas	avellanae	BPIC 631	0,0,1,0,1,0,1,0,3,0,0,0,0,0,0,0,0,0,0,0
	ATLL01000001.1	Pseudomonas	avellanae	CRAFRUec1	0,0,1,0,1,0,1,0,3,0,0,0,0,0,1,0,0,0,0,0
	AVDY02000001.1	Pseudomonas	syringae	USA007	0,0,1,0,1,0,1,1,0,0,0,0,0,0,0,0,0,0,0,0
	AVEP02000001.1	Pseudomonas	syringae	CC1416	0,0,1,0,1,0,1,1,0,1,0,0,0,0,0,0,0,0,0,0
	AVEI02000001.1	Pseudomonas	syringae	CC1544	0,0,1,0,1,0,1,1,1,0,0,0,0,0,0,0,0,0,0,0
	AVEG02000001.1	Pseudomonas	syringae	CC1559	0,0,1,0,1,0,1,2,0,0,0,0,0,0,0,0,0,0,0,0
	AEAK01000001.1	Pseudomonas	syringae	str. ES4326	0,0,1,0,2,0,0,0,0,0,0,0,0,0,0,0,0,0,0,0
	AKCJ01000001.1	Pseudomonas	syringae	str. ISPaVe013	0,0,1,0,3,0,0,0,0,0,0,0,0,0,0,0,0,0,0,0
	AKCK01000001.1	Pseudomonas	syringae	str. ISPaVe037	0,0,1,0,3,0,0,0,0,1,0,0,0,0,0,0,0,0,0,0
	AMXK01000001.1	Pseudomonas	syringae	BRIP34876	0,0,1,0,3,0,1,0,0,0,0,0,0,0,0,0,0,0,0,0
	AMXL01000001.1	Pseudomonas	syringae	BRIP34881	0,0,1,0,3,0,1,0,0,0,0,0,0,0,0,0,0,1,0,0
	ANZF01000001.1	Pseudomonas	syringae	B64	0,0,1,0,3,0,1,0,0,0,1,0,0,0,0,0,0,0,0,0
	AWUI01000001.1	Pseudomonas	syringae	str. DSM 50255	0,0,1,0,3,0,1,0,0,0,1,0,0,0,1,0,0,0,0,0
	APWT01000001.1	Pseudomonas	syringae	SM	0,0,1,0,3,0,1,0,0,1,0,0,0,0,0,0,0,0,0,0
	AVEC02000001.1	Pseudomonas	syringae	CC440	0,0,1,0,3,0,1,0,0,2,0,0,0,0,0,0,0,0,0,0
	AVEJ02000001.1	Pseudomonas	syringae	CC1543	0,0,1,0,3,0,1,0,0,3,0,0,0,0,0,0,0,0,0,0
	AVEN02000001.1	Pseudomonas	syringae	CC1458	0,0,1,0,3,0,1,0,0,4,0,0,0,0,0,0,0,0,0,0
	JALK01000001.1	Pseudomonas	syringae	DSM 10604	0,0,1,0,3,0,1,0,0,5,0,0,0,0,0,0,0,0,0,0
	AUZR02000001.1	Pseudomonas	syringae	str. PP1	0,0,1,0,3,0,1,0,1,0,0,0,0,0,0,0,0,0,0,0
	AMZX01000001.1	Pseudomonas	syringae	BRIP39023	0,0,1,0,3,1,0,0,0,0,0,0,0,0,0,0,0,0,0,0
	AVCR02000001.1	Pseudomonas	syringae	1212	0,0,1,0,3,2,0,0,0,0,0,0,0,0,0,0,0,0,0,0
	NC_007005.1	Pseudomonas	syringae	B728a	0,0,1,0,3,2,0,0,0,0,1,0,0,0,0,0,0,0,0,0
	AVDX02000001.1	Pseudomonas	syringae	USA011	0,0,1,0,3,2,0,0,0,1,0,0,0,0,0,0,0,0,0,0
	AVDZ02000001.1	Pseudomonas	syringae	UB303	0,0,1,0,3,2,0,0,0,2,0,0,0,0,0,0,0,0,0,0
	JALJ01000001.1	Pseudomonas	syringae	str. B301D-R	0,0,1,0,3,2,0,0,0,2,1,0,0,0,0,0,0,0,0,0
	ADGB01000001.1	Pseudomonas	syringae	642	0,0,1,0,3,3,0,0,0,0,0,0,0,0,0,0,0,0,0,0
	AVEE02000001.1	Pseudomonas	syringae	CC1629	0,0,1,0,4,0,0,0,0,0,0,0,0,0,0,0,0,0,0,0
	AVEL02000001.1	Pseudomonas	syringae	CC1513	0,0,1,0,4,0,0,0,0,0,0,1,0,0,0,0,0,0,0,0
	AVEF02000001.1	Pseudomonas	syringae	CC1583	0,0,1,0,5,0,0,0,0,0,0,0,0,0,0,0,0,0,0,0
	AVEM02000001.1	Pseudomonas	syringae	CC1466	0,0,1,0,5,1,0,0,0,0,0,0,0,0,0,0,0,0,0,0
	CP007014.1	Pseudomonas	syringae	CC1557	0,0,1,0,5,1,0,0,0,0,1,0,0,0,0,0,0,0,0,0
	AVDV01000001.1	Pseudomonas	viridiflava	TA043	0,0,1,2,0,0,0,0,0,0,0,0,0,0,0,0,0,0,0,0
	AMQP01000001.1	Pseudomonas	viridiflava	UASWS0038	0,0,1,2,0,0,0,0,1,0,0,0,0,0,0,0,0,0,0,0
	AVDW01000001.1	Pseudomonas	viridiflava	CC1582	0,0,1,2,0,0,0,1,0,0,0,0,0,0,0,0,0,0,0,0
	AVEK02000001.1	Pseudomonas	syringae	CC1524	0,0,1,2,1,0,0,0,0,0,0,0,0,0,0,0,0,0,0,0
	AVEO02000001.1	Pseudomonas	syringae	CC1417	0,0,1,2,1,0,0,0,0,0,0,1,0,0,0,0,0,0,0,0
	AJWX01000001.1	Pseudomonas	sp.	M47T1	0,0,11,0,0,0,0,0,0,0,0,0,0,0,0,0,0,0,0,0
	AFOY02000001.1	Pseudomonas	fluorescens	HK44	0,0,2,0,0,0,0,0,0,0,0,0,0,0,0,0,0,0,0,0
	ALAQ01000001.1	Pseudomonas	fuscovaginae	CB98818	0,0,2,1,0,0,0,0,0,0,0,0,0,0,0,0,0,0,0,0
	BATG01000001.1	Pseudomonas	fuscovaginae	ICMP 5940	0,0,2,1,0,0,0,0,0,0,1,0,0,0,0,0,0,0,0,0
	BATD01000001.1	Pseudomonas	fuscovaginae	DAR 77795	0,0,2,1,0,0,0,0,1,0,0,0,0,0,0,0,0,0,0,0
	BATE01000001.1	Pseudomonas	fuscovaginae	DAR 77800	0,0,2,1,0,0,0,1,0,0,0,0,0,0,0,0,0,0,0,0
	AKBP01000001.1	Pseudomonas	gingeri	NCPPB 3146	0,0,2,1,1,0,0,0,0,0,0,0,0,0,0,0,0,0,0,0
	AKBQ01000001.1	Pseudomonas	agarici	NCPPB 2289	0,0,2,1,2,0,0,0,0,0,0,0,0,0,0,0,0,0,0,0
	AQOH01000001.1	Pseudomonas	fuscovaginae	SE-1	0,0,2,1,3,0,0,0,0,0,0,0,0,0,0,0,0,0,0,0
	ALYL01000001.1	Pseudomonas	fluorescens	R124	0,0,2,2,0,0,0,0,0,0,0,0,0,0,0,0,0,0,0,0
	NC_007492.2	Pseudomonas	fluorescens	Pf0-1	0,0,2,2,1,0,0,0,0,0,0,0,0,0,0,0,0,0,0,0
	AKJQ01000001.1	Pseudomonas	sp.	GM25	0,0,2,2,1,1,0,0,0,0,0,0,0,0,0,0,0,0,0,0
	AKJR01000001.1	Pseudomonas	sp.	GM24	0,0,2,2,3,1,0,0,0,0,0,0,0,0,0,0,0,0,0,0
	AKJV01000001.1	Pseudomonas	sp.	GM16	0,0,2,2,3,1,0,0,0,0,0,0,0,0,0,1,0,0,0,0
	AKJD01000001.1	Pseudomonas	sp.	GM80	0,0,2,2,4,0,0,0,0,0,0,0,0,0,0,0,0,0,0,0
	ANOR01000001.1	Pseudomonas	fluorescens	Pf29Arp	0,0,2,3,0,0,0,0,0,0,0,0,0,0,0,0,0,0,0,0
	AZOC01000001.1	Pseudomonas	brassicacearum	51MFCVI2.1	0,0,2,3,1,1,0,0,0,0,0,0,0,0,0,0,0,0,0,0
	NC_015379.1	Pseudomonas	brassicacearum	NFM421	0,0,2,3,1,1,0,0,0,0,0,0,2,0,0,0,0,0,0,0
	CP007410.1	Pseudomonas	brassicacearum	strain DF41,	0,0,2,3,2,0,0,0,0,0,0,0,0,0,0,0,0,0,0,0
	ASGY01000001.1	Pseudomonas	fluorescens	LMG 5329	0,0,2,4,0,0,0,1,0,0,0,0,0,0,0,0,0,0,0,0
	AVQG01000001.1	Pseudomonas	fluorescens	EGD-AQ6	0,0,2,4,0,1,0,0,0,0,0,0,0,0,0,0,0,0,0,0
	ANNV01000001.1	Pseudomonas	sp.	CBZ-4	0,0,2,4,12,0,0,0,0,0,0,0,0,0,0,0,0,0,0,0
	AOUH01000001.1	Pseudomonas	veronii	1YdBTEX2	0,0,2,4,13,0,0,0,0,0,0,0,0,0,0,0,0,0,0,0
	NZ_CM001514.1	Pseudomonas	synxantha	BG33R	0,0,2,4,14,0,0,0,0,0,0,0,0,0,0,0,0,0,0,0
	AOJA01000001.1	Pseudomonas	fluorescens	FH5	0,0,2,4,2,0,0,0,0,0,0,0,0,0,0,0,0,0,0,0
	NC_020209.1	Pseudomonas	poae	RE*1-1-14,	0,0,2,4,6,0,0,0,0,0,0,0,0,0,0,0,0,0,0,0
	AKVH01000001.1	Pseudomonas	sp.	Ag1	0,0,2,4,7,1,0,0,0,0,0,0,0,0,0,0,0,0,0,0
	AMXG01000001.1	Pseudomonas	sp.	PAMC 26793	0,0,2,4,7,2,0,0,0,0,0,0,0,0,0,0,0,0,0,0
	AHIP01000001.1	Pseudomonas	extremaustralis	14-3 substr. 14-3b strain 14-3	0,0,2,4,8,0,0,0,0,0,0,0,0,0,0,0,0,0,0,0
	AJXG01000001.1	Pseudomonas	tolaasii	PMS117	0,0,2,4,9,0,0,0,0,0,0,0,0,0,0,0,0,0,0,0
	AKYY01000001.1	Pseudomonas	tolaasii	6264	0,0,2,4,9,0,0,0,0,0,0,1,0,0,0,0,0,0,0,0
	AKJF01000001.1	Pseudomonas	sp.	GM78	0,0,2,5,0,1,0,0,0,0,0,0,0,0,0,0,0,0,0,0
	ARLP01000001.1	Pseudomonas	mandelii	36MFCvi1.1	0,0,2,5,1,0,0,0,0,0,0,0,0,0,0,0,0,0,0,0
	AKJB01000001.1	Pseudomonas	sp.	GM102	0,0,2,5,1,1,0,0,0,0,0,0,0,0,0,0,0,0,0,0
	AKJK01000001.1	Pseudomonas	sp.	GM50	0,0,2,5,1,1,1,0,0,0,0,0,0,0,0,0,0,0,0,0
	AKJE01000001.1	Pseudomonas	sp.	GM79	0,0,2,5,1,2,0,0,0,0,0,0,0,0,0,0,0,0,0,0
	AKJT01000001.1	Pseudomonas	sp.	GM18	0,0,2,5,1,3,0,0,0,0,0,0,0,0,0,0,0,0,0,0
	AKJO01000001.1	Pseudomonas	sp.	GM33	0,0,2,5,3,0,1,0,0,0,0,0,0,0,0,0,0,0,0,0
	AKJG01000001.1	Pseudomonas	sp.	GM74	0,0,2,5,3,1,0,0,0,0,0,0,0,0,0,0,0,0,0,0
	AKJJ01000001.1	Pseudomonas	sp.	GM55	0,0,2,5,3,2,0,0,0,0,0,0,0,0,0,0,0,0,0,0
	AKJL01000001.1	Pseudomonas	sp.	GM49	0,0,2,5,3,3,0,0,0,0,0,0,0,0,0,0,0,0,0,0
	AKJM01000001.1	Pseudomonas	sp.	GM48	0,0,2,5,3,4,0,0,0,0,0,0,0,0,0,0,0,0,0,0
	AKJH01000001.1	Pseudomonas	sp.	GM67	0,0,2,5,4,0,0,0,0,0,0,0,0,0,0,0,0,0,0,0
	AKJI01000001.1	Pseudomonas	sp.	GM60	0,0,2,5,4,0,0,0,1,0,0,0,0,0,0,0,0,0,0,0
	AKJS01000001.1	Pseudomonas	sp.	GM21	0,0,2,5,5,0,0,0,0,0,0,0,0,0,0,0,0,0,0,0
	ATBG01000001.1	Pseudomonas	chlororaphis	HT66	0,0,2,6,0,0,0,0,0,0,0,0,0,0,0,0,0,0,0,0
	AWWJ01000001.1	Pseudomonas	chlororaphis	YL-1	0,0,2,6,0,0,1,0,0,0,0,0,0,0,0,0,0,0,0,0
	AHAY01000001.1	Pseudomonas	chlororaphis	GP72	0,0,2,6,0,0,1,0,0,0,1,0,0,0,0,0,0,0,0,0
	NZ_CM001490.1	Pseudomonas	chlororaphis	O6	0,0,2,6,0,0,1,0,0,0,2,0,0,0,0,0,0,0,0,0
	AYUD01000001.1	Pseudomonas	chlororaphis	PB-St2	0,0,2,6,0,0,1,1,0,0,0,0,0,0,0,0,0,0,0,0
	AKJU01000001.1	Pseudomonas	sp.	GM17	0,0,2,6,0,1,0,0,0,0,0,0,0,0,0,0,0,0,0,0
	NZ_CM001559.1	Pseudomonas	chlororaphis	30-84	0,0,2,6,0,1,0,1,0,0,0,0,0,0,0,0,0,0,0,0
	NC_004129.6	Pseudomonas	protegens	Pf-5	0,0,2,8,0,0,0,0,0,0,0,0,0,0,0,0,0,0,0,0
	NC_021237.1	Pseudomonas	protegens	CHA0,	0,0,2,8,0,0,0,0,0,0,1,0,0,0,0,0,0,0,0,0
	ALPV02000001.1	Pseudomonas	putida	LS46	0,0,3,0,0,0,0,0,0,1,0,1,0,0,0,0,0,0,0,0
	NC_009512.1	Pseudomonas	putida	F1	0,0,3,0,0,0,0,0,0,2,0,1,0,0,0,0,0,0,0,0
	NC_017530.1	Pseudomonas	putida	BIRD-1	0,0,3,0,0,0,0,1,1,0,0,0,1,0,0,0,0,0,0,0
	CAED01000001.1	Pseudomonas	putida	B001	0,0,3,0,0,2,0,0,0,0,0,0,0,2,0,0,0,0,0,0
	AHGZ01000001.1	Pseudomonas	monteilii	QM	0,0,3,0,0,2,0,0,0,1,0,0,0,0,0,0,0,0,0,0
	NC_010322.1	Pseudomonas	putida	GB-1	0,0,3,0,0,3,0,0,0,0,0,0,0,0,0,0,0,0,0,0
	NC_021491.1	Pseudomonas	putida	H8234	0,0,3,0,0,4,0,0,0,0,0,0,0,0,0,0,0,0,0,0
	NC_021505.1	Pseudomonas	putida	NBRC 14164	0,0,3,0,0,5,0,0,0,0,0,0,0,0,0,0,0,0,0,0
	ASJX01000001.1	Pseudomonas	plecoglossicida	NB2011	0,0,3,0,1,0,0,0,0,0,0,0,0,0,0,0,0,0,0,0
	AKJC01000001.1	Pseudomonas	sp.	GM84	0,0,3,0,1,1,0,0,0,0,0,0,0,0,0,0,0,0,0,0
	AUEB01000001.1	Pseudomonas	parafulva	DSM 17004	0,0,3,0,2,0,0,0,0,0,0,0,0,0,0,0,0,0,0,0
	AUEC01000001.1	Pseudomonas	taiwanensis	DSM 21245	0,0,3,0,3,0,0,0,0,0,0,0,0,0,0,0,0,0,0,0
	AXUP01000001.1	Pseudomonas	taiwanensis	SJ9	0,0,3,0,4,0,0,0,0,0,0,0,0,0,0,0,0,0,0,0
	CP006978.1	Pseudomonas	monteilii	SB3078	0,0,3,0,4,0,0,0,0,0,1,0,0,0,0,0,0,0,0,0
	CP006979.1	Pseudomonas	monteilii	SB3101	0,0,3,0,4,0,0,0,0,0,1,0,0,0,0,0,0,0,0,1
	NC_015733.1	Pseudomonas	putida	S16	0,0,3,0,4,0,0,0,0,0,2,0,0,0,0,0,0,0,0,0
	NC_019905.1	Pseudomonas	putida	HB3267	0,0,3,0,4,0,0,1,0,0,0,0,0,0,0,0,0,0,0,0
	JHYW01000001.1	Pseudomonas	mosselii	DSM 17497	0,0,3,0,7,0,0,0,0,0,0,0,0,0,0,0,0,0,0,0
	NC_008027.1	Pseudomonas	entomophila	L48	0,0,3,0,8,0,0,0,0,0,0,0,0,0,0,0,0,0,0,0
	NC_010501.1	Pseudomonas	putida	W619	0,0,3,0,9,0,0,0,0,0,0,0,0,0,0,0,0,0,0,0
	AUEA01000001.1	Pseudomonas	cremoricolorata	DSM 17059	0,0,3,3,0,0,0,0,0,0,0,0,0,0,0,0,0,0,0,0
	AUED01000001.1	Pseudomonas	vranovensis	DSM 16006	0,0,3,4,0,0,0,0,0,0,0,0,0,0,0,0,0,0,0,0
	JHYU01000001.1	Pseudomonas	fulva	NBRC 16637 = DSM 17717	0,0,3,5,0,0,0,0,0,0,0,0,1,0,0,0,0,0,0,0
	NC_017532.1	Pseudomonas	stutzeri	DSM 4166	0,0,5,0,0,0,0,0,0,1,0,0,0,0,0,0,0,0,0,0
	AKYE01000001.1	Pseudomonas	stutzeri	XLDN-R	0,0,5,0,0,0,0,0,4,0,0,0,0,0,0,0,0,0,0,0
	AOFQ01000001.1	Pseudomonas	chloritidismutans	AW-1	0,0,5,0,1,0,0,0,0,0,0,0,0,0,0,0,0,0,0,0
	NC_018028.1	Pseudomonas	stutzeri	CCUG 29243	0,0,5,0,1,0,0,1,0,0,0,0,0,0,0,0,0,0,0,0
	AOBS01000001.1	Pseudomonas	stutzeri	NF13	0,0,5,0,1,1,0,0,0,0,0,0,0,0,0,0,0,0,0,0
	NC_019936.1	Pseudomonas	stutzeri	RCH2	0,0,5,0,3,0,0,0,0,0,0,0,0,0,0,0,0,0,0,0
	AGSL01000001.1	Pseudomonas	stutzeri	ATCC 14405 = CCUG 16156	0,0,5,0,4,0,0,0,0,0,0,0,0,0,0,0,0,0,0,0
	NC_018177.1	Pseudomonas	stutzeri	DSM 10701	0,0,5,1,0,0,0,0,0,0,0,0,0,0,0,0,0,0,0,0
	AJXE01000001.1	Pseudomonas	stutzeri	TS44	0,0,5,2,0,0,0,0,0,0,0,0,0,0,0,0,0,0,0,0
	AMSL01000001.1	Pseudomonas	sp.	Chol1	0,0,5,2,0,1,0,0,0,0,0,0,0,0,0,0,0,0,0,0
	ALJC01000001.1	Pseudomonas	psychrophila	HA-4	0,0,6,0,0,0,0,0,0,0,0,0,0,0,0,0,0,0,0,0
	AVQF01000001.1	Pseudomonas	mendocina	EGD-AQ5	0,0,7,0,1,0,0,0,0,0,0,0,0,0,0,0,0,0,0,0
	ANGB01000001.1	Pseudomonas	alcaliphila	34 IA	0,0,7,0,1,0,0,0,1,0,0,0,0,0,0,0,0,0,0,0
	NC_009439.1	Pseudomonas	mendocina	ymp	0,0,7,0,2,0,0,0,0,0,0,0,0,0,0,0,0,0,0,0
	ALKM01000001.1	Pseudomonas	mendocina	DLHK	0,0,7,0,2,0,0,0,1,0,0,0,0,0,0,0,0,0,0,0
	NC_015410.1	Pseudomonas	mendocina	NK-01	0,0,7,0,3,0,0,0,0,0,0,0,0,0,0,0,0,0,0,0
	NC_015556.1	Pseudomonas	fulva	12-X	0,0,7,1,0,0,0,2,0,0,0,0,0,0,0,0,0,0,0,0
	AUDU01000001.1	Pseudomonas	azotifigens	DSM 17556	0,0,8,0,0,0,0,0,0,0,0,0,0,0,0,0,0,0,0,0
	AZOB01000001.1	Pseudomonas	oleovorans	MOIL14HWK12	0,0,9,0,0,0,0,0,0,0,0,0,0,0,0,0,0,0,0,1
	AHBD01000001.1	Pseudomonas	psychrotolerans	L19	0,0,9,0,0,0,0,1,0,0,0,0,0,0,0,0,0,0,0,0
	ANBZ01000001.1	Pseudomonas	sp.	313	0,0,9,0,0,1,0,0,0,0,0,0,0,0,0,0,0,0,0,0
	AJLO01000001.1	Pseudomonas	geniculata	N1	0,1,0,0,0,0,0,0,0,0,0,0,0,0,0,0,0,0,0,0
	ALAT01000001.1	Pseudomonas	luteola	XLDN4-9	0,2,0,0,0,0,0,0,0,0,0,0,0,0,0,0,0,0,0,0
	AROI01000001.1	Pseudomonas	pelagia	CL-AP6	0,3,0,0,0,0,0,0,0,0,0,0,0,0,0,0,0,0,0,0
B	NZ_CP019725.1	Xanthomonas	perforans	91-118	0,1,1,0,0,0,0,0,0,0,0,0,0,0,0,0,0,0,0,0
	NZ_JZVA01000001.1	Xanthomonas	perforans	Xp5-6	0,1,1,0,0,0,0,0,0,0,0,0,0,0,0,1,0,0,0,0
	NZ_JZVB01000001.1	Xanthomonas	perforans	Xp7-12	0,1,1,0,0,0,0,0,0,0,0,0,0,0,1,0,0,0,0,0
	NZ_JZVD01000001.1	Xanthomonas	perforans	Xp9-5	0,1,1,0,0,0,0,0,0,0,0,0,0,0,1,1,0,0,0,0
	NZ_JZVE01000001.1	Xanthomonas	perforans	Xp10-13	0,1,1,0,0,0,0,0,0,0,0,0,0,0,1,0,0,0,1,0
	NZ_JZVF01000001.1	Xanthomonas	perforans	Xp11-2	0,1,1,0,0,0,0,0,0,0,0,0,0,0,0,2,0,0,0,0
	NZ_JZVG01000001.1	Xanthomonas	perforans	Xp15-11	0,1,1,0,0,0,0,0,0,0,0,0,0,0,0,2,0,0,1,0
	NZ_JZVK01000001.1	Xanthomonas	perforans	GEV839	0,1,1,0,0,0,0,0,0,0,0,0,0,0,1,1,1,0,0,0
	NZ_JZVL01000001.1	Xanthomonas	perforans	GEV872	0,1,1,0,0,0,0,0,0,0,0,0,0,0,0,3,0,0,0,0
	NZ_JZVM01000001.1	Xanthomonas	perforans	GEV893	0,1,1,0,0,0,0,0,0,0,0,0,0,0,0,3,0,0,1,0
	NZ_JZUX01000001.1	Xanthomonas	perforans	Xp4B	0,1,1,0,0,0,0,0,0,0,0,0,0,0,2,0,0,0,0,0
	NZ_JZUY01000001.1	Xanthomonas	perforans	Xp3-15	0,1,1,0,0,0,0,0,0,0,0,0,0,0,1,1,1,0,1,0
	NZ_JZVC01000001.1	Xanthomonas	perforans	Xp8-16	0,1,1,0,0,0,0,0,0,0,0,0,0,0,1,0,0,1,0,0
	NZ_JZUZ01000001.1	Xanthomonas	perforans	Xp4-20	0,1,1,0,0,0,0,0,0,0,0,0,0,0,3,0,0,0,0,0
	NZ_JZVH01000001.1	Xanthomonas	perforans	Xp17-12	0,1,1,0,0,0,0,0,0,0,0,0,0,0,4,0,0,0,0,0
	NZ_JZVI01000001.1	Xanthomonas	perforans	Xp18-15	0,1,1,0,0,0,0,0,0,0,0,0,0,0,0,2,0,1,0,0
	NZ_JZVN01000001.1	Xanthomonas	perforans	GEV904	0,1,1,0,0,0,0,0,0,0,0,0,0,0,0,3,0,0,2,0
	NZ_JZVO01000001.1	Xanthomonas	perforans	GEV909	0,1,1,0,0,0,0,0,0,0,0,0,0,0,0,3,0,0,3,0
	NZ_JZVR01000001.1	Xanthomonas	perforans	GEV936	0,1,1,0,0,0,0,0,0,0,0,0,0,0,0,3,0,0,4,0
	NZ_JZVP01000001.1	Xanthomonas	perforans	GEV915	0,1,1,0,0,0,0,0,0,0,0,0,0,0,0,3,0,0,5,0
	NZ_JZVQ01000001.1	Xanthomonas	perforans	GEV917	0,1,1,0,0,0,0,0,0,0,0,0,0,0,0,3,0,0,6,0
	NZ_JZVS01000001.1	Xanthomonas	perforans	GEV940	0,1,1,0,0,0,0,0,0,0,0,0,0,0,0,3,0,0,7,0
	NZ_JZVY01000001.1	Xanthomonas	perforans	GEV1054	0,1,1,0,0,0,0,0,0,0,0,0,0,0,1,0,0,1,1,0
	NZ_JZVX01000001.1	Xanthomonas	perforans	GEV1044	0,1,1,0,0,0,0,0,0,0,0,0,0,0,1,0,0,1,2,0
	NZ_JZWA01000001.1	Xanthomonas	perforans	TB6	0,1,1,0,0,0,0,0,0,0,0,0,0,0,1,0,0,2,0,0
	NZ_JZWB01000001.1	Xanthomonas	perforans	TB9	0,1,1,0,0,0,0,0,0,0,0,0,0,0,5,0,0,0,0,0
	NZ_JZVU01000001.1	Xanthomonas	perforans	GEV993	0,1,1,0,0,0,0,0,0,0,0,0,0,0,0,3,0,0,8,0
	NZ_JZVT01000001.1	Xanthomonas	perforans	GEV968	0,1,1,0,0,0,0,0,0,0,0,0,0,0,0,3,0,0,9,0
	NZ_JZVV01000001.1	Xanthomonas	perforans	GEV1001	0,1,1,0,0,0,0,0,0,0,0,0,0,0,1,0,0,0,2,0
	NZ_JZVW01000001.1	Xanthomonas	perforans	GEV1026	0,1,1,0,0,0,0,0,0,0,0,0,0,0,0,3,0,0,10,0
	NZ_JZVZ01000001.1	Xanthomonas	perforans	GEV1063	0,1,1,0,0,0,0,0,0,0,0,0,0,0,1,0,0,0,3,0
	NZ_JZWC01000001.1	Xanthomonas	perforans	TB15	0,1,1,0,0,0,0,0,0,0,0,0,0,0,1,0,1,0,0,0
	NZ_CP018475.1	Xanthomonas	perforans	LH3	0,1,1,0,0,0,0,0,0,0,0,0,0,0,0,0,1,0,0,0
	NZ_MOLQ01000001.1	Xanthomonas	perforans	CFBP 7293	0,1,1,0,0,0,0,0,0,0,0,0,0,0,0,0,0,0,0,1
	NZ_PUWN01000001.1	Xanthomonas	perforans	GEV2004	0,1,1,0,0,0,0,0,0,0,0,0,0,0,1,0,0,3,0,0
	NZ_PUWL01000001.1	Xanthomonas	perforans	GEV2010	0,1,1,0,0,0,0,0,0,0,0,0,0,0,4,0,0,1,0,0
	NZ_PUUY01000001.1	Xanthomonas	perforans	GEV2116	0,1,1,0,0,0,0,0,0,0,0,0,0,0,1,0,0,4,0,0
	NZ_PUUX01000001.1	Xanthomonas	perforans	GEV2117	0,1,1,0,0,0,0,0,0,0,0,0,0,0,1,0,0,0,4,0
	NZ_PUUS01000001.1	Xanthomonas	perforans	GEV2124	0,1,1,0,0,0,0,0,0,0,0,0,0,0,4,0,0,1,1,0
	NZ_PUUN01000001.1	Xanthomonas	perforans	GEV2129	0,1,1,0,0,0,0,0,0,0,0,0,0,0,1,0,0,2,1,0
	NZ_PUUT01000001.1	Xanthomonas	perforans	GEV2122	0,1,1,0,0,0,0,0,0,0,0,0,0,0,4,0,0,1,2,0
	NZ_PUUM01000001.1	Xanthomonas	perforans	GEV2130	0,1,1,0,0,0,0,0,0,0,0,0,0,0,4,0,0,2,0,0
	NZ_PUVO01000001.1	Xanthomonas	perforans	GEV1921	0,1,1,0,0,0,0,0,0,0,0,0,0,0,1,0,0,2,2,0
C	CP031773.1	Lysinibacillus	fusiformis	Cu1-5	1,0,0,0,0,0,0,0,0,0,0,0,0,0,0,0,0,0,0,0
	NZ_VEEI01000010.1	Lysinibacillus	fusiformis	DE0175	1,0,0,0,0,0,1,0,0,0,0,0,0,0,0,0,0,0,0,0
	NZ_VLYA01000057.1	Lysinibacillus	sp.	BW-2-10 BW-2-10	1,1,0,0,0,0,0,0,0,0,0,0,0,0,0,0,0,0,0,0
	NZ_CP041696.1	Lysinibacillus	fusiformis	1226	1,0,1,0,0,0,0,0,0,0,0,0,0,0,0,0,0,0,0,0
	NZ_SADX01000010.1	Lysinibacillus	sp.	SDF0063 SDF0063	2,0,0,0,0,0,0,0,0,0,0,0,0,0,0,0,0,0,0,0
	NZ_SADV01000010.1	Lysinibacillus	sp.	SDF0037 SDF0037	1,0,1,1,0,0,0,0,0,0,0,0,0,0,0,0,0,0,0,0
	NZ_VIXB01000001.1	Lysinibacillus	fusiformis	3193	1,0,0,0,1,0,0,0,0,0,0,0,0,0,0,0,0,0,0,0
	NZ_BJOM01000001.1	Lysinibacillus	fusiformis	NBRC 15717	1,0,0,0,0,0,0,0,1,0,0,0,0,0,0,0,0,0,0,0
	NZ_BJNS01000001.1	Lysinibacillus	sphaericus	NBRC 15095	1,0,1,2,0,0,0,0,0,0,0,0,0,0,0,0,0,0,0,0
	NZ_CP028083.1	Lysinibacillus	sp.	SGAir0095 SGAir0095	1,1,1,0,0,0,0,0,0,0,0,0,0,0,0,0,0,0,0,0
	NZ_SZPU01000115.1	Lysinibacillus	mangiferihumi	CCTCC AB 2010389	1,0,1,2,0,0,0,0,1,0,0,0,0,0,0,0,0,0,0,0
	NZ_SZPV01000013.1	Lysinibacillus	varians	NBRC 109424	1,0,1,2,0,0,0,0,0,0,0,1,0,0,0,0,0,0,0,0
	NZ_SZPS01000010.1	Lysinibacillus	sphaericus	NRRL B-23268	1,0,1,2,0,0,0,0,0,0,0,0,0,0,0,0,0,0,0,1
	NZ_SZPT01000011.1	Lysinibacillus	tabacifolii	KCTC 33042	1,0,1,2,0,0,0,0,0,0,0,2,0,0,0,0,0,0,0,0
	NZ_SRPH01000072.1	Lysinibacillus	sp.	S2017 S2017	1,2,0,0,0,0,0,0,0,0,0,0,0,0,0,0,0,0,0,0
	NZ_SOCD01000001.1	Lysinibacillus	sp.	YR326 YR326	1,0,1,1,0,1,0,0,0,0,0,0,0,0,0,0,0,0,0,0
	NZ_SOEQ01000001.1	Lysinibacillus	xylanilyticus	KCTC 13423	1,0,1,1,0,1,0,1,0,0,0,0,0,0,0,0,0,0,0,0
	NZ_SMDJ01000001.1	Lysinibacillus	sp.	BK089 BK089	1,0,1,1,0,0,1,0,0,0,0,0,0,0,0,0,0,0,0,0
	NZ_SJDS01000001.1	Lysinibacillus	sp.	OL1 OL1	1,0,0,0,2,0,0,0,0,0,0,0,0,0,0,0,0,0,0,0
	NZ_CP026120.1	Lysinibacillus	sphaericus	KCCM 35418	1,0,0,0,0,0,0,0,1,0,0,0,0,0,0,0,0,1,0,0
	NZ_RYYR01000001.1	Lysinibacillus	sp.	SYSU K30002 SYSU K30002	1,1,0,0,0,0,0,0,0,1,0,0,0,0,0,0,0,0,0,0
	NZ_RXNR01000100.1	Lysinibacillus	telephonicus	S5H2222	1,1,2,0,0,0,0,0,0,0,0,0,0,0,0,0,0,0,0,0
	NZ_UYIR01000040.1	Lysinibacillus	sphaericus	NCTC11025	1,3,0,0,0,0,0,0,0,0,0,0,0,0,0,0,0,0,0,0
	NZ_RRCT01000010.1	Lysinibacillus	composti	MCCC 1A12701	1,1,3,0,0,0,0,0,0,0,0,0,0,0,0,0,0,0,0,0
	NZ_RHLQ01000100.1	Lysinibacillus	halotolerans	MCCC 1A12703	1,1,4,0,0,0,0,0,0,0,0,0,0,0,0,0,0,0,0,0
	NZ_RBZN01000100.1	Lysinibacillus	endophyticus	DSM 100506	1,1,5,0,0,0,0,0,0,0,0,0,0,0,0,0,0,0,0,0
	NZ_QWEI01000001.1	Lysinibacillus	sp.	YLB-03 YLB-03	1,1,6,0,0,0,0,0,0,0,0,0,0,0,0,0,0,0,0,0
	DOML01000423.1	Lysinibacillus	sp.	UBA9408	1,0,0,0,1,0,0,0,0,1,0,0,0,0,0,0,0,0,0,0
	DNVS01000051.1	Lysinibacillus	sp.	UBA8585	1,0,0,0,0,1,0,0,0,0,0,0,0,0,0,0,0,0,0,0
	DNAR01000093.1	Lysinibacillus	sp.	UBA12273	1,0,0,0,0,0,0,0,1,0,0,0,1,0,0,0,0,0,0,0
	NZ_UFSZ01000003.1	Lysinibacillus	sphaericus	NCTC10338	1,0,1,2,0,0,0,0,0,0,0,0,0,0,0,0,0,0,0,2
	NZ_PXXX01000001.1	Lysinibacillus	sp.	PB300 PB300	1,0,0,0,2,0,0,0,1,0,0,0,0,0,0,0,0,0,0,0
	NZ_PXXY01000001.1	Lysinibacillus	fusiformis	NRRL NRS-350	1,0,0,0,0,0,0,0,1,0,0,0,0,0,0,0,0,0,1,0
	NZ_UAQE01000011.1	Lysinibacillus	sphaericus	NCTC7582	1,0,0,0,2,0,0,0,1,0,1,0,0,0,0,0,0,0,0,0
	NZ_QJTJ01000001.1	Lysinibacillus	chungkukjangi	KACC 16626	1,1,1,1,0,0,0,0,0,0,0,0,0,0,0,0,0,0,0,0
	NZ_CP029002.1	Lysinibacillus	sp.	2017 2017	1,2,0,0,0,0,0,0,0,0,0,0,0,0,0,0,0,1,0,0
	NZ_QAFW01000100.1	Lysinibacillus	jejuensis	N25	1,4,0,0,0,0,0,0,0,0,0,0,0,0,0,0,0,0,0,0
	NZ_PYWM01000096.1	Lysinibacillus	mangiferihumi	M-GX18	1,0,1,2,0,0,0,0,1,0,0,0,0,0,0,0,0,1,0,0
	NZ_PYWK01000010.1	Lysinibacillus	fluoroglycofenilyticus	cmg86	1,5,0,0,0,0,0,0,0,0,0,0,0,0,0,0,0,0,0,0
	NZ_PYWJ01000099.1	Lysinibacillus	chungkukjangi	2RL32	1,1,1,1,0,0,0,0,0,0,0,0,0,1,0,0,0,0,0,0
	NZ_PYWG01000010.1	Lysinibacillus	parviboronicapiens	VT1065	1,0,1,0,1,0,0,0,0,0,0,0,0,0,0,0,0,0,0,0
	NZ_PYUE01000010.1	Lysinibacillus	tabacifolii	K3514	1,0,1,2,0,0,0,0,0,0,0,2,0,0,0,0,0,0,1,0
	NZ_PYWI01000097.1	Lysinibacillus	parviboronicapiens	BAM-582	1,0,1,0,1,0,0,0,0,0,1,0,0,0,0,0,0,0,0,0
	NZ_PYWN01000097.1	Lysinibacillus	meyeri	WS4626	1,5,0,1,0,0,0,0,0,0,0,0,0,0,0,0,0,0,0,0
	NZ_PYWH01000010.1	Lysinibacillus	parviboronicapiens	VT1066	1,0,1,0,1,0,0,0,0,0,0,0,0,0,0,0,0,0,0,1
	NZ_PYWL01000010.1	Lysinibacillus	fusiformis	ATCC 7055	1,0,0,0,0,0,0,0,1,0,0,0,0,0,0,0,0,2,0,0
	NZ_LT985980.1	Lysinibacillus	timonensis	Marseille-P5727	1,1,7,0,0,0,0,0,0,0,0,0,0,0,0,0,0,0,0,0
	NZ_CP019980.1	Lysinibacillus	sphaericus	DSM 28	1,0,1,2,0,0,0,0,0,0,0,0,0,0,0,0,0,0,0,3
	CP027224.1	Lysinibacillus	sp.	B2A1 B2A1	1,0,1,3,0,0,0,0,0,0,0,0,0,0,0,0,0,0,0,0
	NZ_PGLV01000001.1	Lysinibacillus	sphaericus	A1	1,0,1,2,0,0,0,1,0,0,0,0,0,0,0,0,0,0,0,0
	NZ_CP026007.1	Lysinibacillus	sp.	YS11 YS11	1,0,0,0,2,0,0,0,1,0,0,1,0,0,0,0,0,0,0,0
	NZ_CM009107.1	Lysinibacillus	fusiformis	Juneja	1,0,0,0,1,0,0,0,0,1,0,1,0,0,0,0,0,0,0,0
	NZ_PHQY01000001.1	Lysinibacillus	xylanilyticus	t26	1,0,1,1,0,1,0,2,0,0,0,0,0,0,0,0,0,0,0,0
	NZ_PEKE01000012.1	Lysinibacillus	sphaericus	KU skv2 1	1,0,0,0,0,2,0,0,0,0,0,0,0,0,0,0,0,0,0,0
	DLNE01000021.1	Lysinibacillus	sp.	UBA7518	1,0,0,0,1,0,0,0,0,0,0,0,1,0,0,0,0,0,0,0
	NZ_OBQC01000039.1	Lysinibacillus	acetophenoni	JC23	1,1,8,0,0,0,0,0,0,0,0,0,0,0,0,0,0,0,0,0
	NZ_OBMQ01000030.1	Lysinibacillus	xyleni	JC22	1,1,5,0,1,0,0,0,0,0,0,0,0,0,0,0,0,0,0,0
	DKJS01000034.1	Lysinibacillus	sp.	UBA6686	1,0,1,3,0,1,0,0,0,0,0,0,0,0,0,0,0,0,0,0
	DKIU01000033.1	Lysinibacillus	odysseyi	UBA6710	1,6,0,0,0,0,0,0,0,0,0,0,0,0,0,0,0,0,0,0
	DJUL01000006.1	Lysinibacillus	fusiformis	UBA6283	1,0,0,0,0,0,0,0,1,0,0,0,0,1,0,0,0,0,0,0
	DJUE01000005.1	Lysinibacillus	sp.	UBA6290	1,0,1,2,1,0,0,0,0,0,0,0,0,0,0,0,0,0,0,0
	DJJP01000033.1	Lysinibacillus	fusiformis	UBA6565	1,0,0,0,2,0,0,1,0,0,0,0,0,0,0,0,0,0,0,0
	DJFL01000015.1	Lysinibacillus	sphaericus	UBA5873	1,0,0,0,0,2,0,0,0,0,0,0,0,1,0,0,0,0,0,0
	DJAY01000005.1	Lysinibacillus	sp.	UBA5990	1,0,0,0,0,1,0,0,1,0,0,0,0,0,0,0,0,0,0,0
	DJAU01000051.1	Lysinibacillus	sp.	UBA5994	1,0,0,0,2,0,0,0,1,0,0,2,0,0,0,0,0,0,0,0
	DJAV01000023.1	Lysinibacillus	fusiformis	UBA5993	1,0,0,0,0,0,0,0,1,0,0,0,0,2,0,0,0,0,0,0
	DIGU01000011.1	Lysinibacillus	sphaericus	UBA5714	1,0,0,0,0,2,0,0,0,0,0,0,0,2,0,0,0,0,0,0
	DGFP01000042.1	Lysinibacillus	sphaericus	UBA3897	1,0,0,0,0,2,0,0,0,0,0,0,0,3,0,0,0,0,0,0
	DGKR01000024.1	Lysinibacillus	fusiformis	UBA4565	1,0,0,0,0,0,0,0,1,0,0,0,0,2,0,0,1,0,0,0
	DFQN01000010.1	Lysinibacillus	fusiformis	UBA3488	1,0,0,0,0,0,0,0,0,0,0,0,1,0,0,0,0,0,0,0
	DFOG01000015.1	Lysinibacillus	fusiformis	UBA3547	1,0,0,0,0,0,0,0,1,0,0,0,0,3,0,0,0,0,0,0
	DFOC01000083.1	Lysinibacillus	sp.	UBA3551	1,0,1,1,0,1,0,2,1,0,0,0,0,0,0,0,0,0,0,0
	DFCZ01000091.1	Lysinibacillus	sphaericus	UBA3040	1,0,0,0,0,2,0,0,0,0,0,0,1,0,0,0,0,0,0,0
	DFCR01000094.1	Lysinibacillus	fusiformis	UBA3049	1,0,0,0,2,0,0,1,0,0,0,1,0,0,0,0,0,0,0,0
	NZ_NTMQ01000001.1	Lysinibacillus	fusiformis	GM	1,0,0,0,0,0,0,0,1,0,0,0,2,0,0,0,0,0,0,0
	DDLI01000010.1	Lysinibacillus	sp.	UBA2576	1,0,1,2,1,0,0,0,1,0,0,0,0,0,0,0,0,0,0,0
	DDLO01000012.1	Lysinibacillus	fusiformis	UBA2570	1,0,0,0,0,0,0,0,0,0,1,0,0,0,0,0,0,0,0,0
	DDAI01000030.1	Lysinibacillus	fusiformis	UBA2062	1,0,0,0,2,0,0,0,1,0,0,3,0,0,0,0,0,0,0,0
	DCZS01000026.1	Lysinibacillus	sp.	UBA2078	1,0,0,0,1,0,0,0,0,1,1,0,0,0,0,0,0,0,0,0
	DCDJ01000023.1	Lysinibacillus	sp.	UBA1058	1,0,1,2,1,0,0,0,1,0,0,1,0,0,0,0,0,0,0,0
	DCDM01000009.1	Lysinibacillus	fusiformis	UBA1055	1,0,0,0,0,0,0,0,0,0,0,1,0,0,0,0,0,0,0,0
	NZ_MWSJ01000010.1	Lysinibacillus	sp.	KCTC 33748 KCTC 33748	1,0,1,1,0,2,0,0,0,0,0,0,0,0,0,0,0,0,0,0
	NZ_AVCW01000001.1	Lysinibacillus	boronitolerans	NBRC 103108	1,0,0,0,2,0,1,0,0,0,0,0,0,0,0,0,0,0,0,0
	NZ_AVDA01000001.1	Lysinibacillus	manganicus	DSM 26584	1,1,8,1,0,0,0,0,0,0,0,0,0,0,0,0,0,0,0,0
	NZ_AVCZ01000001.1	Lysinibacillus	massiliensis	4400831	1,1,9,0,0,0,0,0,0,0,0,0,0,0,0,0,0,0,0,0
	NZ_AVCY01000001.1	Lysinibacillus	sinduriensis	JCM 15800	1,1,1,2,0,0,0,0,0,0,0,0,0,0,0,0,0,0,0,0
	NZ_AVCX01000001.1	Lysinibacillus	odysseyi	NBRC 100172	1,6,0,0,0,0,0,0,0,0,0,1,0,0,0,0,0,0,0,0
	NZ_FUYW01000057.1	Lysinibacillus	sp.	AC-3 AC-3	1,0,1,1,0,2,0,0,0,0,0,0,0,0,0,0,0,0,0,0
	NZ_FOZT01000036.1	Lysinibacillus	sp.	BC-43 BC-43	1,0,0,0,0,0,0,0,1,0,0,0,3,0,0,0,0,0,0,0
	NZ_FOZQ01000038.1	Lysinibacillus	sp.	SG55 SG55	1,0,0,0,1,0,0,0,0,1,0,1,1,0,0,0,0,0,0,0
	NZ_FOQQ01000035.1	Lysinibacillus	sp.	SG53 SG53	1,0,0,0,0,0,0,0,1,0,0,0,3,0,1,0,0,0,0,0
	NZ_FOCR01000042.1	Lysinibacillus	sp.	SG45 SG45	1,0,0,0,0,0,0,0,1,0,0,0,0,4,0,0,0,0,0,0
	NZ_FOEL01000044.1	Lysinibacillus	sp.	TC-13 TC-13	1,0,0,0,0,0,0,0,1,0,0,0,0,4,0,0,0,0,0,1
	NZ_FMYD01000036.1	Lysinibacillus	sp.	BC-14 BC-14	1,0,0,0,0,0,0,0,1,0,0,0,3,0,1,0,0,0,0,1
	NZ_FMXU01000035.1	Lysinibacillus	sp.	TC-37 TC-37	1,0,0,0,1,0,0,0,0,1,0,1,1,0,0,0,0,0,1,0
	NZ_FMVP01000045.1	Lysinibacillus	sp.	LD79 LD79	1,0,0,0,0,0,0,0,1,0,0,0,0,4,0,0,0,0,0,2
	NZ_FMUG01000036.1	Lysinibacillus	sp.	SG8 SG8	1,0,0,0,0,0,0,0,1,0,0,0,3,0,1,0,0,0,0,2
	NZ_FMUO01000043.1	Lysinibacillus	sp.	SG9 SG9	1,0,0,0,1,0,0,0,0,1,0,1,1,0,0,0,0,0,2,0
	NZ_CP017560.1	Lysinibacillus	sphaericus	LMG 22257	1,7,0,0,0,0,0,0,0,0,0,0,0,0,0,0,0,0,0,0
	NZ_JOTQ01000001.1	Lysinibacillus	sphaericus	FSL M8-0337	1,0,1,2,0,0,0,1,0,0,0,1,0,0,0,0,0,0,0,0
	NZ_KV766182.1	Lysinibacillus	fusiformis	M5	1,0,0,0,0,1,0,0,1,0,0,0,0,1,0,0,0,0,0,0
	NZ_MDDN01000001.1	Lysinibacillus	xylanilyticus	SR-86	1,0,1,1,1,0,0,0,0,0,0,0,0,0,0,0,0,0,0,0
	NZ_MDGU01000001.1	Lysinibacillus	sp.	AR18-8 AR18-8	1,0,0,0,2,0,0,0,1,0,2,0,0,0,0,0,0,0,0,0
	NZ_CP015224.1	Lysinibacillus	sphaericus	2362	1,0,0,0,0,2,0,0,0,0,0,0,0,4,0,0,0,0,0,0
	NZ_LWHI01000001.1	Lysinibacillus	sphaericus	OT4b.49	1,0,0,0,0,2,0,0,0,0,0,0,0,4,0,0,0,0,0,1
	NZ_CP014856.1	Lysinibacillus	sphaericus	III(3)7	1,0,0,0,0,2,0,0,0,0,0,0,0,4,0,0,0,0,0,2
	NZ_LUFJ01000001.1	Lysinibacillus	sp.	KCTC 13219 KCTC 13219	1,5,0,0,0,0,0,0,0,0,1,0,0,0,0,0,0,0,0,0
	NZ_BCVX01000001.1	Lysinibacillus	odysseyi	NBRC 100172	1,6,0,0,0,0,0,0,0,0,0,1,0,0,0,0,0,0,0,1
	NZ_KB933398.1	Lysinibacillus	sphaericus	OT4b.31	1,0,1,0,2,0,0,0,0,0,0,0,0,0,0,0,0,0,0,0
	NZ_CP014643.1	Lysinibacillus	sphaericus	OT4b.25	1,0,0,0,0,2,0,0,0,0,0,0,0,4,0,0,0,0,0,3
	NZ_AJXM01000001.1	Lysinibacillus	boronitolerans	F1182	1,0,0,0,2,0,1,0,0,0,1,0,0,0,0,0,0,0,0,0
	NZ_LKIE01000001.1	Lysinibacillus	sp.	F5 F5	1,0,0,0,1,0,0,0,0,1,0,1,0,1,0,0,0,0,0,0
	NZ_AMQZ01000001.1	Lysinibacillus	fusiformis	ZB2	1,0,0,0,2,0,0,1,1,0,0,0,0,0,0,0,0,0,0,0
	NZ_BBDJ01000001.1	Lysinibacillus	pakistanensis	JCM 18776	1,0,1,3,0,1,0,1,0,0,0,0,0,0,0,0,0,0,0,0
	NZ_BBCN01000001.1	Lysinibacillus	boronitolerans	JCM 21713	1,0,0,0,2,0,1,0,0,0,0,0,0,1,0,0,0,0,0,0
	NZ_BBBP01000001.1	Lysinibacillus	parviboronicapiens	JCM 18861	1,0,1,0,1,0,0,0,0,0,1,0,0,0,1,0,0,0,0,0
	NZ_KQ465106.1	Lysinibacillus	sp.	ZYM-1 ZYM-1	1,0,0,0,0,3,0,0,0,0,0,0,0,0,0,0,0,0,0,0
	NZ_LJYY01000001.1	Lysinibacillus	sphaericus	B1-CDA	1,0,0,0,2,0,0,0,1,0,0,4,0,0,0,0,0,0,0,0
	NZ_AMQZ01000001.1	Lysinibacillus	fusiformis	ZB2	1,0,0,0,2,0,0,1,1,0,0,0,0,0,0,0,0,0,0,0
	NZ_CP010820.1	Lysinibacillus	fusiformis	RB-21	1,0,0,0,0,0,0,0,0,0,0,0,2,0,0,0,0,0,0,0
	NZ_LGCI01000005.1	Lysinibacillus	macroides	DSM 54	1,0,0,1,0,0,0,0,0,0,0,0,0,0,0,0,0,0,0,0
	NZ_LGRV01000003.1	Lysinibacillus	contaminans	DSM 25560	1,0,2,0,0,0,0,0,0,0,0,0,0,0,0,0,0,0,0,0
	NZ_LIYL01000061.1	Lysinibacillus	sp.	FJAT-14222 FJAT-14222	1,0,1,1,0,3,0,0,0,0,0,0,0,0,0,0,0,0,0,0
	NZ_LITM01000010.1	Lysinibacillus	sp.	FJAT-14745 FJAT-14745	1,0,1,1,0,4,0,0,0,0,0,0,0,0,0,0,0,0,0,0
	NZ_LFXJ01000005.1	Lysinibacillus	xylanilyticus	DSM 23493	1,0,1,1,0,1,0,1,0,0,0,0,0,0,0,1,0,0,0,0
	NZ_LDUJ01000001.1	Lysinibacillus	sp.	LK3 LK3	1,0,0,0,2,0,0,0,1,0,0,3,1,0,0,0,0,0,0,0
	LN483073.1	Lysinibacillus	saudimassiliensis	13S34_air	1,4,0,1,0,0,0,0,0,0,0,0,0,0,0,0,0,0,0,0
	NZ_CP010820.1	Lysinibacillus	fusiformis	RB-21	1,0,0,0,0,0,0,0,0,0,0,0,2,0,0,0,0,0,0,0
	NZ_JSZM01000001.1	Lysinibacillus	sp.	A1 A1	1,0,0,0,0,0,0,0,0,0,0,0,2,0,0,0,0,0,0,1
	NZ_ADJR01000113.1	Lysinibacillus	fusiformis	ZC1	1,0,0,0,2,0,0,1,1,0,0,0,0,1,0,0,0,0,0,0
	NZ_JPVP01000060.1	Lysinibacillus	odysseyi	NBRC 100172	1,6,0,0,0,0,0,0,0,0,0,1,0,0,0,0,0,0,0,0
	NZ_JPVQ01000001.1	Lysinibacillus	massiliensis	CCUG 49529	1,1,9,0,0,0,0,0,0,0,0,0,0,0,0,0,0,0,0,0
	NZ_JPVO01000055.1	Lysinibacillus	sinduriensis	JCM 15800	1,1,1,2,0,0,0,0,0,0,0,0,0,0,0,0,0,0,0,0
	NZ_JPVN01000001.1	Lysinibacillus	manganicus	DSM 26584	1,1,8,1,0,0,0,0,0,0,0,0,0,0,0,0,0,0,0,0
	NZ_JPVR01000081.1	Lysinibacillus	boronitolerans	NBRC 103108	1,0,0,0,2,0,1,0,0,0,0,0,0,0,0,0,0,0,0,0
	NZ_JRBA01000001.1	Lysinibacillus	fusiformis	SW-B9	1,0,0,0,0,0,0,0,0,0,0,0,3,0,0,0,0,0,0,0
	NZ_JPUW01000001.1	Lysinibacillus	sp.	BF-4 BF-4	1,4,0,1,0,0,0,1,0,0,0,0,0,0,0,0,0,0,0,0
	NZ_JPDM01000001.1	Lysinibacillus	sphaericus	NRS1693	1,0,0,0,1,0,0,0,0,1,0,2,0,0,0,0,0,0,0,0
	NZ_JPDL01000001.1	Lysinibacillus	sphaericus	LP1-G	1,0,0,0,0,2,0,0,0,0,0,0,0,5,0,0,0,0,0,0
	NZ_JPDJ01000001.1	Lysinibacillus	sphaericus	2297	1,0,0,0,0,2,0,0,0,0,0,0,0,6,0,0,0,0,0,0
	NZ_JPDK01000001.1	Lysinibacillus	sphaericus	SSII-1	1,0,0,0,0,2,0,0,0,0,0,0,2,0,0,0,0,0,0,0
	NZ_JPEF01000001.1	Lysinibacillus	fusiformis	RB-21	1,0,0,0,0,0,0,0,0,0,0,0,2,0,0,0,0,0,0,0
	NZ_JMMU01000001.1	Lysinibacillus	sphaericus	1987	1,0,0,0,0,0,0,0,0,0,1,1,0,0,0,0,0,0,0,0
	NZ_AYMK01000001.1	Lysinibacillus	fusiformis	H1k	1,0,0,0,0,0,1,0,0,0,1,0,0,0,0,0,0,0,0,0
	NZ_KK037167.1	Lysinibacillus	sphaericus	CBAM5	1,0,0,0,0,2,0,0,0,0,0,0,0,4,0,0,0,0,1,0
	NZ_CP006837.1	Lysinibacillus	varians	GY32	1,0,1,2,0,0,0,0,0,0,0,1,0,0,0,0,0,0,0,1
	NZ_AUOZ01000001.1	Lysinibacillus	sphaericus	KCTC 3346	1,0,1,2,0,0,0,0,0,0,0,0,0,0,0,0,0,0,0,4
	NC_010382.1	Lysinibacillus	sphaericus	C3-41	1,0,0,0,0,2,0,0,0,0,0,0,0,4,0,0,0,1,0,0
D	NZ_CM004499.1	Xylella	fastidiosa	11399	0,5,0,0,0,0,0,0,0,0,0,0,0,0,0,0,0,0,0,0
	NZ_CP009829.1	Xylella	fastidiosa	3124	0,5,0,0,0,0,0,0,0,0,1,0,0,0,0,0,0,0,0,0
	NZ_AWYH01000001.1	Xylella	fastidiosa	32	0,5,0,0,0,0,0,0,0,0,1,0,0,0,0,0,0,1,0,0
	NZ_CM007617.1	Xylella	fastidiosa	6c	0,5,0,0,0,0,0,0,0,0,2,0,0,0,0,0,0,0,0,0
	NC_002488.3	Xylella	fastidiosa	9a5c	0,5,0,0,0,0,0,0,0,0,0,1,0,0,0,0,0,0,0,0
	NZ_KE386775.1	Xylella	fastidiosa	ATCC-35871	0,5,0,0,0,0,0,1,0,0,0,0,0,0,0,0,0,0,0,0
	NZ_JQAP01000001.1	Xylella	fastidiosa	ATCC-35879	0,5,0,0,0,0,0,1,1,0,0,0,0,0,0,0,0,0,0,0
	NZ_CP006696.1	Xylella	fastidiosa	Ann-1	0,5,0,0,0,0,0,1,2,0,0,0,0,0,0,0,0,0,0,0
	NZ_MPAZ01000045.1	Xylella	fastidiosa	BB01	0,5,0,0,0,0,0,1,0,0,0,1,0,0,0,0,0,0,0,0
	NZ_PHFQ01000001.1	Xylella	fastidiosa	CFBP7969	0,5,0,0,0,0,0,1,1,0,0,0,0,0,1,0,0,0,0,0
	NZ_PHFR01000001.1	Xylella	fastidiosa	CFBP7970	0,5,0,0,0,0,0,1,1,0,0,0,0,0,2,0,0,0,0,0
	NZ_PHFP01000001.1	Xylella	fastidiosa	CFBP8071	0,5,0,0,0,0,0,1,1,0,0,0,0,1,0,0,0,0,0,0
	NZ_LKDK01000001.1	Xylella	fastidiosa	CFBP8072	0,5,0,0,0,0,0,0,1,0,0,0,0,0,0,0,0,0,0,0
	NZ_LKES01000001.1	Xylella	fastidiosa	CFBP8073	0,5,0,0,0,0,0,1,1,0,1,0,0,0,0,0,0,0,0,0
	NZ_PHFS01000001.1	Xylella	fastidiosa	CFBP8078	0,5,0,0,0,0,0,1,0,0,0,0,1,0,0,0,0,0,0,0
	NZ_PHFT01000001.1	Xylella	fastidiosa	CFBP8082	0,5,0,0,0,0,0,1,1,0,0,0,0,0,3,0,0,0,0,0
	NZ_PHFU01000001.1	Xylella	fastidiosa	CFBP8351	0,5,0,0,0,0,0,1,1,0,0,0,0,1,0,1,0,0,0,0
	NZ_PHFV01000001.1	Xylella	fastidiosa	CFBP8356	0,5,0,0,0,0,0,1,1,1,0,0,0,0,0,0,0,0,0,0
	LUYC01000001.1	Xylella	fastidiosa	CFBP8416	0,5,0,0,0,0,0,1,0,0,0,2,0,0,0,0,0,0,0,0
	NZ_LUYB01000001.1	Xylella	fastidiosa	CFBP8417	0,5,0,0,0,0,0,1,0,0,0,2,1,0,0,0,0,0,0,0
	NZ_LUYA01000001.1	Xylella	fastidiosa	CFBP8418	0,5,0,0,0,0,0,1,0,0,0,2,1,0,0,0,0,1,0,0
	NZ_LJZW01000001.1	Xylella	fastidiosa	CO33	0,5,0,0,0,0,0,1,1,1,0,0,0,1,0,0,0,0,0,0
	NZ_CM003758.1	Xylella	fastidiosa	COF0324	0,5,0,0,0,0,0,0,0,0,2,0,0,1,0,0,0,0,0,0
	NZ_CM003762.1	Xylella	fastidiosa	COF0407	0,5,0,0,0,0,0,0,1,0,1,0,0,0,0,0,0,0,0,0
	NZ_CM003754.1	Xylella	fastidiosa	CVC0251	0,5,0,0,0,0,0,0,0,0,0,0,0,1,0,0,0,0,0,0
	NZ_CM003748.1	Xylella	fastidiosa	CVC0256	0,5,0,0,0,0,0,0,0,0,0,0,0,1,0,0,0,1,0,0
	NZ_CM003178.1	Xylella	fastidiosa	CoDiRO	0,5,0,0,0,0,0,0,1,0,1,0,0,0,0,0,1,0,0,0
	NZ_FQWN01000063.1	Xylella	fastidiosa	DSM-10026	0,5,0,0,0,0,0,1,1,0,0,0,0,0,2,0,1,0,0,0
	NZ_CP020870.1	Xylella	fastidiosa	De-Donno	0,5,0,0,0,0,0,0,1,0,1,0,0,0,0,0,1,1,0,0
	NZ_AAAL02000032.1	Xylella	fastidiosa	Dixon	0,5,0,0,0,0,0,1,0,0,0,2,1,0,0,1,0,0,0,0
	NZ_AFDJ01000168.1	Xylella	fastidiosa	EB92.1	0,5,0,0,0,0,0,1,1,0,0,0,0,2,0,0,0,0,0,0
	NZ_CM013391.1	Xylella	fastidiosa	ESVL	0,5,0,0,0,0,0,1,0,0,0,2,2,0,0,0,0,0,0,0
	NZ_CP010051.2	Xylella	fastidiosa	Fb7	0,5,0,0,0,0,0,0,0,0,0,2,0,0,0,0,0,0,0,0
	NC_017562.1	Xylella	fastidiosa	GB514	0,5,0,0,0,0,0,1,1,0,0,0,0,1,1,0,0,0,0,0
	NZ_AVGA01000001.1	Xylella	fastidiosa	Griffin-1	0,5,0,0,0,0,0,1,0,0,0,2,0,1,0,0,0,0,0,0
	NZ_CP009885.1	Xylella	fastidiosa	Hib4	0,5,0,0,0,0,0,0,0,0,3,0,0,0,0,0,0,0,0,0
	NZ_CM010656.1	Xylella	fastidiosa	IVIA5235	0,5,0,0,0,0,0,1,1,0,0,0,0,1,0,2,0,0,0,0
	NZ_QPQW01000053.1	Xylella	fastidiosa	IVIA5901	0,5,0,0,0,0,0,1,0,0,0,2,2,0,0,0,0,1,0,0
	NZ_CP009823.1	Xylella	fastidiosa	J1a12	0,5,0,0,0,0,0,0,0,0,0,0,0,1,1,0,0,0,0,0
	NC_010513.1	Xylella	fastidiosa	M12	0,5,0,0,0,0,0,1,0,0,0,2,0,1,0,0,1,0,0,0
	NC_010577.1	Xylella	fastidiosa	M23	0,5,0,0,0,0,0,1,1,0,0,0,0,1,2,0,0,0,0,0
	NZ_CP006740.1	Xylella	fastidiosa	MUL0034	0,5,0,0,0,0,0,1,1,2,0,0,0,0,0,0,0,0,0,0
	NZ_AXDP01000001.1	Xylella	fastidiosa	Mul-MD	0,5,0,0,0,0,0,1,1,2,0,0,0,0,1,0,0,0,0,0
	NZ_CM003752.1	Xylella	fastidiosa	OLS0478	0,5,0,0,0,0,0,0,1,0,1,0,0,0,1,0,0,0,0,0
	NZ_CM003743.1	Xylella	fastidiosa	OLS0479	0,5,0,0,0,0,0,0,1,0,1,0,0,0,1,0,1,0,0,0
	NZ_JDSQ01000001.1	Xylella	taiwanensis	PLS229	0,5,0,1,0,0,0,0,0,0,0,0,0,0,0,0,0,0,0,0
	NZ_CP011800.1	Xylella	taiwanensis	PLS235	0,5,0,1,0,0,0,0,0,0,0,0,0,0,0,0,1,0,0,0
	NZ_CP009826.1	Xylella	fastidiosa	Pr8x	0,5,0,0,0,0,0,0,0,0,2,0,0,0,0,1,0,0,0,0
	NZ_CP016608.1	Xylella	fastidiosa	Salento-1	0,5,0,0,0,0,0,0,1,0,1,0,0,0,0,0,1,1,1,0
	NZ_CP016610.1	Xylella	fastidiosa	Salento-2	0,5,0,0,0,0,0,0,1,0,1,0,0,0,0,0,1,1,2,0
	NC_004556.1	Xylella	fastidiosa	Temecula1	0,5,0,0,0,0,0,1,1,0,0,0,0,1,2,1,0,0,0,0
	NZ_CP009790.1	Xylella	fastidiosa	U24D	0,5,0,0,0,0,0,0,0,0,0,1,0,0,0,0,0,0,0,1
	NZ_QTJT01000001.1	Xylella	fastidiosa	XYL1732	0,5,0,0,0,0,0,1,1,0,0,0,0,1,0,2,0,1,0,0
	NZ_QTJS01000001.1	Xylella	fastidiosa	XYL2055	0,5,0,0,0,0,0,1,1,0,0,0,0,1,0,2,0,2,0,0
	NZ_JMHP01000001.1	Xylella	fastidiosa	sycamore-Sy-VA	0,5,0,0,0,0,0,1,0,0,0,0,2,0,0,0,0,0,0,0
E	ATXQ01000001.1	Pseudomonas	caeni	DSM 24390	0,4,0,0,0,0,0,0,0,0,0,0,0,0,0,0,0,0,0,0

## Sheet: Supplementary Table 2
Supplementary Table 2. Cophenetic correlations of hierarchical clustering dendrograms based on similarity matrices generated by different software
Data set A
	pyANI	Sourmash k=21	Sourmash k=51	FastANI	LINflow
pyANI	1	0.8541	0.7877	0.619	0.9954
Sourmash k=21	0.8541	1	0.9813	0.474	0.8467
Sourmash k=51	0.7877	0.9813	1	0.4321	0.7716
FastANI	0.619	0.474	0.4321	1	0.6216
LINflow	0.9954	0.8467	0.7716	0.6216	1
Data set B
	pyANI	Sourmash k=21	Sourmash k=51	FastANI	LINflow
pyANI	1	0.831	0.87	0.858	0.686
Sourmash k=21	0.831	1	0.988	0.777	0.886
Sourmash k=51	0.87	0.988	1	0.812	0.869
FastANI	0.686	0.886	0.869	1	0.599
LINflow	0.858	0.777	0.812	0.599
Data set C
	pyANI	Sourmash k=21	Sourmash k=51	FastANI	LINflow
pyANI	1	0.766	0.638	0.543	0.98
Sourmash k=21	0.766	1	0.974	0.326	0.705
Sourmash k=51	0.638	0.974	1	0.266	0.583
FastANI	0.543	0.326	0.266	1	0.611
LINflow	0.98	0.705	0.583	0.611	1
Data set D
	pyANI	Sourmash k=21	Sourmash k=51	FastANI	LINflow
pyANI	1	0.803	0.649	0.997	0.997
Sourmash k=21	0.803	1	0.971	0.759	0.763
Sourmash k=51	0.649	0.971	1	0.595	0.6
FastANI	0.997	0.759	0.595	1	0.999
LINflow	0.997	0.763	0.6	0.999	1
