# Supplementary material for: LINflow: a computational pipeline that combines an alignment-free with an alignment-based method to accelerate generation of similarity matrices for prokaryotic genomes
Source: PeerJ journal article supplement (doi:10.7717/peerj.10906), 2021-03-24
Supplement: Supplementary_Figures_1_through_5.pdf [file Supplementary_Figures_1_through_5.pdf]

**Supplementary Figure 2.** Heatmap based on the ANI matrix calculated by FastANI for data set A.

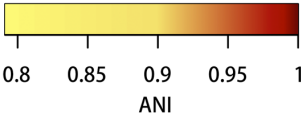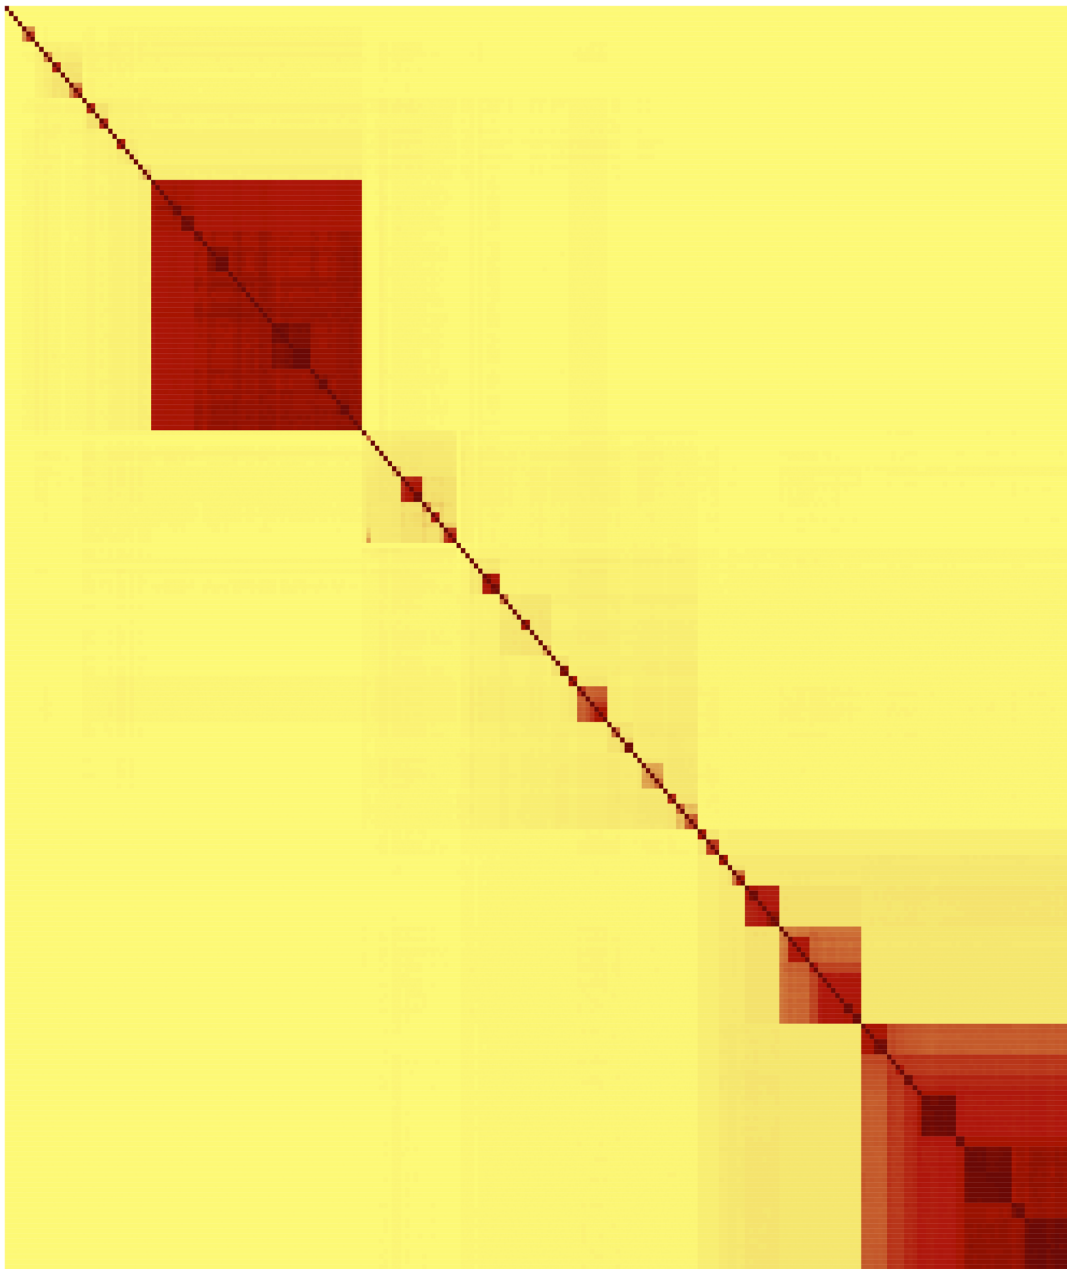

DSM 24390  
 DSM 16289  
 DSM 16290  
 DSM 16291  
 DSM 16292  
 DSM 16293  
 DSM 16294  
 DSM 16295 = CCUG 16156  
 DSM 16296  
 DSM 16297  
 DSM 16298  
 DSM 16299  
 DSM 16300  
 DSM 16301  
 DSM 16302  
 DSM 16303  
 DSM 16304  
 DSM 16305  
 DSM 16306  
 DSM 16307  
 DSM 16308  
 DSM 16309  
 DSM 16310  
 DSM 16311  
 DSM 16312  
 DSM 16313  
 DSM 16314  
 DSM 16315  
 DSM 16316  
 DSM 16317  
 DSM 16318  
 DSM 16319  
 DSM 16320  
 DSM 16321  
 DSM 16322  
 DSM 16323  
 DSM 16324  
 DSM 16325  
 DSM 16326  
 DSM 16327  
 DSM 16328  
 DSM 16329  
 DSM 16330  
 DSM 16331  
 DSM 16332  
 DSM 16333  
 DSM 16334  
 DSM 16335  
 DSM 16336  
 DSM 16337  
 DSM 16338  
 DSM 16339  
 DSM 16340  
 DSM 16341  
 DSM 16342  
 DSM 16343  
 DSM 16344  
 DSM 16345  
 DSM 16346  
 DSM 16347  
 DSM 16348  
 DSM 16349  
 DSM 16350  
 DSM 16351  
 DSM 16352  
 DSM 16353  
 DSM 16354  
 DSM 16355  
 DSM 16356  
 DSM 16357  
 DSM 16358  
 DSM 16359  
 DSM 16360  
 DSM 16361  
 DSM 16362  
 DSM 16363  
 DSM 16364  
 DSM 16365  
 DSM 16366  
 DSM 16367  
 DSM 16368  
 DSM 16369  
 DSM 16370  
 DSM 16371  
 DSM 16372  
 DSM 16373  
 DSM 16374  
 DSM 16375  
 DSM 16376  
 DSM 16377  
 DSM 16378  
 DSM 16379  
 DSM 16380  
 DSM 16381  
 DSM 16382  
 DSM 16383  
 DSM 16384  
 DSM 16385  
 DSM 16386  
 DSM 16387  
 DSM 16388  
 DSM 16389  
 DSM 16390  
 DSM 16391  
 DSM 16392  
 DSM 16393  
 DSM 16394  
 DSM 16395  
 DSM 16396  
 DSM 16397  
 DSM 16398  
 DSM 16399  
 DSM 16400  
 DSM 16401  
 DSM 16402  
 DSM 16403  
 DSM 16404  
 DSM 16405  
 DSM 16406  
 DSM 16407  
 DSM 16408  
 DSM 16409  
 DSM 16410  
 DSM 16411  
 DSM 16412  
 DSM 16413  
 DSM 16414  
 DSM 16415  
 DSM 16416  
 DSM 16417  
 DSM 16418  
 DSM 16419  
 DSM 16420  
 DSM 16421  
 DSM 16422  
 DSM 16423  
 DSM 16424  
 DSM 16425  
 DSM 16426  
 DSM 16427  
 DSM 16428  
 DSM 16429  
 DSM 16430  
 DSM 16431  
 DSM 16432  
 DSM 16433  
 DSM 16434  
 DSM 16435  
 DSM 16436  
 DSM 16437  
 DSM 16438  
 DSM 16439  
 DSM 16440  
 DSM 16441  
 DSM 16442  
 DSM 16443  
 DSM 16444  
 DSM 16445  
 DSM 16446  
 DSM 16447  
 DSM 16448  
 DSM 16449  
 DSM 16450  
 DSM 16451  
 DSM 16452  
 DSM 16453  
 DSM 16454  
 DSM 16455  
 DSM 16456  
 DSM 16457  
 DSM 16458  
 DSM 16459  
 DSM 16460  
 DSM 16461  
 DSM 16462  
 DSM 16463  
 DSM 16464  
 DSM 16465  
 DSM 16466  
 DSM 16467  
 DSM 16468  
 DSM 16469  
 DSM 16470  
 DSM 16471  
 DSM 16472  
 DSM 16473  
 DSM 16474  
 DSM 16475  
 DSM 16476  
 DSM 16477  
 DSM 16478  
 DSM 16479  
 DSM 16480  
 DSM 16481  
 DSM 16482  
 DSM 16483  
 DSM 16484  
 DSM 16485  
 DSM 16486  
 DSM 16487  
 DSM 16488  
 DSM 16489  
 DSM 16490  
 DSM 16491  
 DSM 16492  
 DSM 16493  
 DSM 16494  
 DSM 16495  
 DSM 16496  
 DSM 16497  
 DSM 16498  
 DSM 16499  
 DSM 16500  
 DSM 16501  
 DSM 16502  
 DSM 16503  
 DSM 16504  
 DSM 16505  
 DSM 16506  
 DSM 16507  
 DSM 16508  
 DSM 16509  
 DSM 16510  
 DSM 16511  
 DSM 16512  
 DSM 16513  
 DSM 16514  
 DSM 16515  
 DSM 16516  
 DSM 16517  
 DSM 16518  
 DSM 16519  
 DSM 16520  
 DSM 16521  
 DSM 16522  
 DSM 16523  
 DSM 16524  
 DSM 16525  
 DSM 16526  
 DSM 16527  
 DSM 16528  
 DSM 16529  
 DSM 16530  
 DSM 16531  
 DSM 16532  
 DSM 16533  
 DSM 16534  
 DSM 16535  
 DSM 16536  
 DSM 16537  
 DSM 16538  
 DSM 16539  
 DSM 16540  
 DSM 16541  
 DSM 16542  
 DSM 16543  
 DSM 16544  
 DSM 16545  
 DSM 16546  
 DSM 16547  
 DSM 16548  
 DSM 16549  
 DSM 16550  
 DSM 16551  
 DSM 16552  
 DSM 16553  
 DSM 16554  
 DSM 16555  
 DSM 16556  
 DSM 16557  
 DSM 16558  
 DSM 16559  
 DSM 16560  
 DSM 16561  
 DSM 16562  
 DSM 16563  
 DSM 16564  
 DSM 16565  
 DSM 16566  
 DSM 16567  
 DSM 16568  
 DSM 16569  
 DSM 16570  
 DSM 16571  
 DSM 16572  
 DSM 16573  
 DSM 16574  
 DSM 16575  
 DSM 16576  
 DSM 16577  
 DSM 16578  
 DSM 16579  
 DSM 16580  
 DSM 16581  
 DSM 16582  
 DSM 16583  
 DSM 16584  
 DSM 16585  
 DSM 16586  
 DSM 16587  
 DSM 16588  
 DSM 16589  
 DSM 16590  
 DSM 16591  
 DSM 16592  
 DSM 16593  
 DSM 16594  
 DSM 16595  
 DSM 16596  
 DSM 16597  
 DSM 16598  
 DSM 16599  
 DSM 16600

**Supplementary Figure 3.** Heatmap based on the ANI matrix calculated by LINflow for data set A.

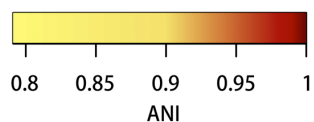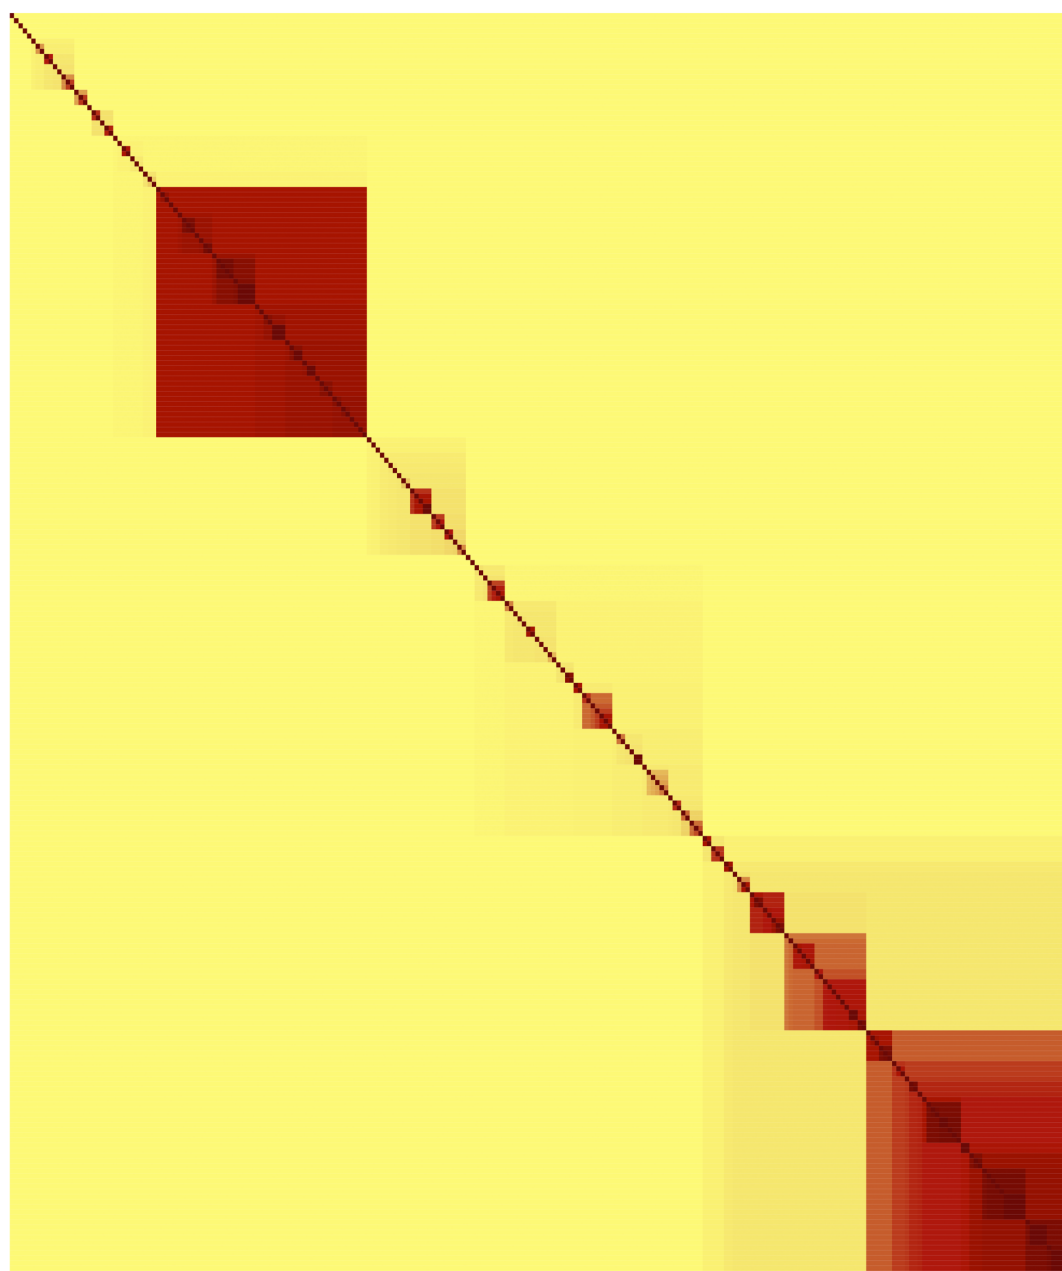

DSM 24390  
 ATCC 35061  
 ATCC 4304  
 ATCC 4322  
 ATCC 4324  
 ATCC 4325  
 ATCC 4326  
 ATCC 4327  
 ATCC 4328  
 ATCC 4329  
 ATCC 4330  
 ATCC 4331  
 ATCC 4332  
 ATCC 4333  
 ATCC 4334  
 ATCC 4335  
 ATCC 4336  
 ATCC 4337  
 ATCC 4338  
 ATCC 4339  
 ATCC 4340  
 ATCC 4341  
 ATCC 4342  
 ATCC 4343  
 ATCC 4344  
 ATCC 4345  
 ATCC 4346  
 ATCC 4347  
 ATCC 4348  
 ATCC 4349  
 ATCC 4350  
 ATCC 4351  
 ATCC 4352  
 ATCC 4353  
 ATCC 4354  
 ATCC 4355  
 ATCC 4356  
 ATCC 4357  
 ATCC 4358  
 ATCC 4359  
 ATCC 4360  
 ATCC 4361  
 ATCC 4362  
 ATCC 4363  
 ATCC 4364  
 ATCC 4365  
 ATCC 4366  
 ATCC 4367  
 ATCC 4368  
 ATCC 4369  
 ATCC 4370  
 ATCC 4371  
 ATCC 4372  
 ATCC 4373  
 ATCC 4374  
 ATCC 4375  
 ATCC 4376  
 ATCC 4377  
 ATCC 4378  
 ATCC 4379  
 ATCC 4380  
 ATCC 4381  
 ATCC 4382  
 ATCC 4383  
 ATCC 4384  
 ATCC 4385  
 ATCC 4386  
 ATCC 4387  
 ATCC 4388  
 ATCC 4389  
 ATCC 4390  
 ATCC 4391  
 ATCC 4392  
 ATCC 4393  
 ATCC 4394  
 ATCC 4395  
 ATCC 4396  
 ATCC 4397  
 ATCC 4398  
 ATCC 4399  
 ATCC 4400  
 ATCC 4401  
 ATCC 4402  
 ATCC 4403  
 ATCC 4404  
 ATCC 4405  
 ATCC 4406  
 ATCC 4407  
 ATCC 4408  
 ATCC 4409  
 ATCC 4410  
 ATCC 4411  
 ATCC 4412  
 ATCC 4413  
 ATCC 4414  
 ATCC 4415  
 ATCC 4416  
 ATCC 4417  
 ATCC 4418  
 ATCC 4419  
 ATCC 4420  
 ATCC 4421  
 ATCC 4422  
 ATCC 4423  
 ATCC 4424  
 ATCC 4425  
 ATCC 4426  
 ATCC 4427  
 ATCC 4428  
 ATCC 4429  
 ATCC 4430  
 ATCC 4431  
 ATCC 4432  
 ATCC 4433  
 ATCC 4434  
 ATCC 4435  
 ATCC 4436  
 ATCC 4437  
 ATCC 4438  
 ATCC 4439  
 ATCC 4440  
 ATCC 4441  
 ATCC 4442  
 ATCC 4443  
 ATCC 4444  
 ATCC 4445  
 ATCC 4446  
 ATCC 4447  
 ATCC 4448  
 ATCC 4449  
 ATCC 4450  
 ATCC 4451  
 ATCC 4452  
 ATCC 4453  
 ATCC 4454  
 ATCC 4455  
 ATCC 4456  
 ATCC 4457  
 ATCC 4458  
 ATCC 4459  
 ATCC 4460  
 ATCC 4461  
 ATCC 4462  
 ATCC 4463  
 ATCC 4464  
 ATCC 4465  
 ATCC 4466  
 ATCC 4467  
 ATCC 4468  
 ATCC 4469  
 ATCC 4470  
 ATCC 4471  
 ATCC 4472  
 ATCC 4473  
 ATCC 4474  
 ATCC 4475  
 ATCC 4476  
 ATCC 4477  
 ATCC 4478  
 ATCC 4479  
 ATCC 4480  
 ATCC 4481  
 ATCC 4482  
 ATCC 4483  
 ATCC 4484  
 ATCC 4485  
 ATCC 4486  
 ATCC 4487  
 ATCC 4488  
 ATCC 4489  
 ATCC 4490  
 ATCC 4491  
 ATCC 4492  
 ATCC 4493  
 ATCC 4494  
 ATCC 4495  
 ATCC 4496  
 ATCC 4497  
 ATCC 4498  
 ATCC 4499  
 ATCC 4500  
 ATCC 4501  
 ATCC 4502  
 ATCC 4503  
 ATCC 4504  
 ATCC 4505  
 ATCC 4506  
 ATCC 4507  
 ATCC 4508  
 ATCC 4509  
 ATCC 4510  
 ATCC 4511  
 ATCC 4512  
 ATCC 4513  
 ATCC 4514  
 ATCC 4515  
 ATCC 4516  
 ATCC 4517  
 ATCC 4518  
 ATCC 4519  
 ATCC 4520  
 ATCC 4521  
 ATCC 4522  
 ATCC 4523  
 ATCC 4524  
 ATCC 4525  
 ATCC 4526  
 ATCC 4527  
 ATCC 4528  
 ATCC 4529  
 ATCC 4530  
 ATCC 4531  
 ATCC 4532  
 ATCC 4533  
 ATCC 4534  
 ATCC 4535  
 ATCC 4536  
 ATCC 4537  
 ATCC 4538  
 ATCC 4539  
 ATCC 4540  
 ATCC 4541  
 ATCC 4542  
 ATCC 4543  
 ATCC 4544  
 ATCC 4545  
 ATCC 4546  
 ATCC 4547  
 ATCC 4548  
 ATCC 4549  
 ATCC 4550  
 ATCC 4551  
 ATCC 4552  
 ATCC 4553  
 ATCC 4554  
 ATCC 4555  
 ATCC 4556  
 ATCC 4557  
 ATCC 4558  
 ATCC 4559  
 ATCC 4560  
 ATCC 4561  
 ATCC 4562  
 ATCC 4563  
 ATCC 4564  
 ATCC 4565  
 ATCC 4566  
 ATCC 4567  
 ATCC 4568  
 ATCC 4569  
 ATCC 4570  
 ATCC 4571  
 ATCC 4572  
 ATCC 4573  
 ATCC 4574  
 ATCC 4575  
 ATCC 4576  
 ATCC 4577  
 ATCC 4578  
 ATCC 4579  
 ATCC 4580  
 ATCC 4581  
 ATCC 4582  
 ATCC 4583  
 ATCC 4584  
 ATCC 4585  
 ATCC 4586  
 ATCC 4587  
 ATCC 4588  
 ATCC 4589  
 ATCC 4590  
 ATCC 4591  
 ATCC 4592  
 ATCC 4593  
 ATCC 4594  
 ATCC 4595  
 ATCC 4596  
 ATCC 4597  
 ATCC 4598  
 ATCC 4599  
 ATCC 4600  
 ATCC 4601  
 ATCC 4602  
 ATCC 4603  
 ATCC 4604  
 ATCC 4605  
 ATCC 4606  
 ATCC 4607  
 ATCC 4608  
 ATCC 4609  
 ATCC 4610  
 ATCC 4611  
 ATCC 4612  
 ATCC 4613  
 ATCC 4614  
 ATCC 4615  
 ATCC 4616  
 ATCC 4617  
 ATCC 4618  
 ATCC 4619  
 ATCC 4620  
 ATCC 4621  
 ATCC 4622  
 ATCC 4623  
 ATCC 4624  
 ATCC 4625  
 ATCC 4626  
 ATCC 4627  
 ATCC 4628  
 ATCC 4629  
 ATCC 4630  
 ATCC 4631  
 ATCC 4632  
 ATCC 4633  
 ATCC 4634  
 ATCC 4635  
 ATCC 4636  
 ATCC 4637  
 ATCC 4638  
 ATCC 4639  
 ATCC 4640  
 ATCC 4641  
 ATCC 4642  
 ATCC 4643  
 ATCC 4644  
 ATCC 4645  
 ATCC 4646  
 ATCC 4647  
 ATCC 4648  
 ATCC 4649  
 ATCC 4650  
 ATCC 4651  
 ATCC 4652  
 ATCC 4653  
 ATCC 4654  
 ATCC 4655  
 ATCC 4656  
 ATCC 4657  
 ATCC 4658  
 ATCC 4659  
 ATCC 4660  
 ATCC 4661  
 ATCC 4662  
 ATCC 4663  
 ATCC 4664  
 ATCC 4665  
 ATCC 4666  
 ATCC 4667  
 ATCC 4668  
 ATCC 4669  
 ATCC 4670  
 ATCC 4671  
 ATCC 4672  
 ATCC 4673  
 ATCC 4674  
 ATCC 4675  
 ATCC 4676  
 ATCC 4677  
 ATCC 4678  
 ATCC 4679  
 ATCC 4680  
 ATCC 4681  
 ATCC 4682  
 ATCC 4683  
 ATCC 4684  
 ATCC 4685  
 ATCC 4686  
 ATCC 4687  
 ATCC 4688  
 ATCC 4689  
 ATCC 4690  
 ATCC 4691  
 ATCC 4692  
 ATCC 4693  
 ATCC 4694  
 ATCC 4695  
 ATCC 4696  
 ATCC 4697  
 ATCC 4698  
 ATCC 4699  
 ATCC 4700  
 ATCC 4701  
 ATCC 4702  
 ATCC 4703  
 ATCC 4704  
 ATCC 4705  
 ATCC 4706  
 ATCC 4707  
 ATCC 4708  
 ATCC 4709  
 ATCC 4710  
 ATCC 4711  
 ATCC 4712  
 ATCC 4713  
 ATCC 4714  
 ATCC 4715  
 ATCC 4716  
 ATCC 4717  
 ATCC 4718  
 ATCC 4719  
 ATCC 4720  
 ATCC 4721  
 ATCC 4722  
 ATCC 4723  
 ATCC 4724  
 ATCC 4725  
 ATCC 4726  
 ATCC 4727  
 ATCC 4728  
 ATCC 4729  
 ATCC 4730  
 ATCC 4731  
 ATCC 4732  
 ATCC 4733  
 ATCC 4734  
 ATCC 4735  
 ATCC 4736  
 ATCC 4737  
 ATCC 4738  
 ATCC 4739  
 ATCC 4740  
 ATCC 4741  
 ATCC 4742  
 ATCC 4743  
 ATCC 4744  
 ATCC 4745  
 ATCC 4746  
 ATCC 4747  
 ATCC 4748  
 ATCC 4749  
 ATCC 4750  
 ATCC 4751  
 ATCC 4752  
 ATCC 4753  
 ATCC 4754  
 ATCC 4755  
 ATCC 4756  
 ATCC 4757  
 ATCC 4758  
 ATCC 4759  
 ATCC 4760  
 ATCC 4761  
 ATCC 4762  
 ATCC 4763  
 ATCC 4764  
 ATCC 4765  
 ATCC 4766  
 ATCC 4767  
 ATCC 4768  
 ATCC 4769  
 ATCC 4770  
 ATCC 4771  
 ATCC 4772  
 ATCC 4773  
 ATCC 4774  
 ATCC 4775  
 ATCC 4776  
 ATCC 4777  
 ATCC 4778  
 ATCC 4779  
 ATCC 4780  
 ATCC 4781  
 ATCC 4782  
 ATCC 4783  
 ATCC 4784  
 ATCC 4785  
 ATCC 4786  
 ATCC 4787  
 ATCC 4788  
 ATCC 4789  
 ATCC 4790  
 ATCC 4791  
 ATCC 4792  
 ATCC 4793  
 ATCC 4794  
 ATCC 4795  
 ATCC 4796  
 ATCC 4797  
 ATCC 4798  
 ATCC 4799  
 ATCC 4800  
 ATCC 4801  
 ATCC 4802  
 ATCC 4803  
 ATCC 4804  
 ATCC 4805  
 ATCC 4806  
 ATCC 4807  
 ATCC 4808  
 ATCC 4809  
 ATCC 4810  
 ATCC 4811  
 ATCC 4812  
 ATCC 4813  
 ATCC 4814  
 ATCC 4815  
 ATCC 4816  
 ATCC 4817  
 ATCC 4818  
 ATCC 4819  
 ATCC 4820  
 ATCC 4821  
 ATCC 4822  
 ATCC 4823  
 ATCC 4824  
 ATCC 4825  
 ATCC 4826  
 ATCC 4827  
 ATCC 4828  
 ATCC 4829  
 ATCC 4830  
 ATCC 4831  
 ATCC 4832  
 ATCC 4833  
 ATCC 4834  
 ATCC 4835  
 ATCC 4836  
 ATCC 4837  
 ATCC 4838  
 ATCC 4839  
 ATCC 4840  
 ATCC 4841  
 ATCC 4842  
 ATCC 4843  
 ATCC 4844  
 ATCC 4845  
 ATCC 4846  
 ATCC 4847  
 ATCC 4848  
 ATCC 4849  
 ATCC 4850  
 ATCC 4851  
 ATCC 4852  
 ATCC 4853  
 ATCC 4854  
 ATCC 4855  
 ATCC 4856  
 ATCC 4857  
 ATCC 4858  
 ATCC 4859  
 ATCC 4860  
 ATCC 4861  
 ATCC 4862  
 ATCC 4863  
 ATCC 4864  
 ATCC 4865  
 ATCC 4866  
 ATCC 4867  
 ATCC 4868  
 ATCC 4869  
 ATCC 4870  
 ATCC 4871  
 ATCC 4872  
 ATCC 4873  
 ATCC 4874  
 ATCC 4875  
 ATCC 4876  
 ATCC 4877  
 ATCC 4878  
 ATCC 4879  
 ATCC 4880  
 ATCC 4881  
 ATCC 4882  
 ATCC 4883  
 ATCC 4884  
 ATCC 4885  
 ATCC 4886  
 ATCC 4887  
 ATCC 4888  
 ATCC 4889  
 ATCC 4890  
 ATCC 4891  
 ATCC 4892  
 ATCC 4893  
 ATCC 4894  
 ATCC 4895  
 ATCC 4896  
 ATCC 4897  
 ATCC 4898  
 ATCC 4899  
 ATCC 4900  
 ATCC 4901  
 ATCC 4902  
 ATCC 4903  
 ATCC 4904  
 ATCC 4905  
 ATCC 4906  
 ATCC 4907  
 ATCC 4908  
 ATCC 4909  
 ATCC 4910  
 ATCC 4911  
 ATCC 4912  
 ATCC 4913  
 ATCC 4914  
 ATCC 4915  
 ATCC 4916  
 ATCC 4917  
 ATCC 4918  
 ATCC 4919  
 ATCC 4920  
 ATCC 4921  
 ATCC 4922  
 ATCC 4923  
 ATCC 4924  
 ATCC 4925  
 ATCC 4926  
 ATCC 4927  
 ATCC 4928  
 ATCC 4929  
 ATCC 4930  
 ATCC 4931  
 ATCC 4932  
 ATCC 4933  
 ATCC 4934  
 ATCC 4935  
 ATCC 4936  
 ATCC 4937  
 ATCC 4938  
 ATCC 4939  
 ATCC 4940  
 ATCC 4941  
 ATCC 4942  
 ATCC 4943  
 ATCC 4944  
 ATCC 4945  
 ATCC 4946  
 ATCC 4947  
 ATCC 4948  
 ATCC 4949  
 ATCC 4950  
 ATCC 4951  
 ATCC 4952  
 ATCC 4953  
 ATCC 4954  
 ATCC 4955  
 ATCC 4956  
 ATCC 4957  
 ATCC 4958  
 ATCC 4959  
 ATCC 4960  
 ATCC 4961  
 ATCC 4962  
 ATCC 4963  
 ATCC 4964  
 ATCC 4965  
 ATCC 4966  
 ATCC 4967  
 ATCC 4968  
 ATCC 4969  
 ATCC 4970  
 ATCC 4971  
 ATCC 4972  
 ATCC 4973  
 ATCC 4974  
 ATCC 4975  
 ATCC 4976  
 ATCC 4977  
 ATCC 4978  
 ATCC 4979  
 ATCC 4980  
 ATCC 4981  
 ATCC 4982  
 ATCC 4983  
 ATCC 4984  
 ATCC 4985  
 ATCC 4986  
 ATCC 4987  
 ATCC 4988  
 ATCC 4989  
 ATCC 4990  
 ATCC 4991  
 ATCC 4992  
 ATCC 4993  
 ATCC 4994  
 ATCC 4995  
 ATCC 4996  
 ATCC 4997  
 ATCC 4998  
 ATCC 4999  
 ATCC 5000



**Supplementary Figure 5.** Heatmap based on the Jaccard similarity matrix calculated by sourmash with k=51 for data set A.

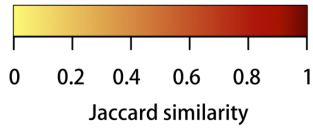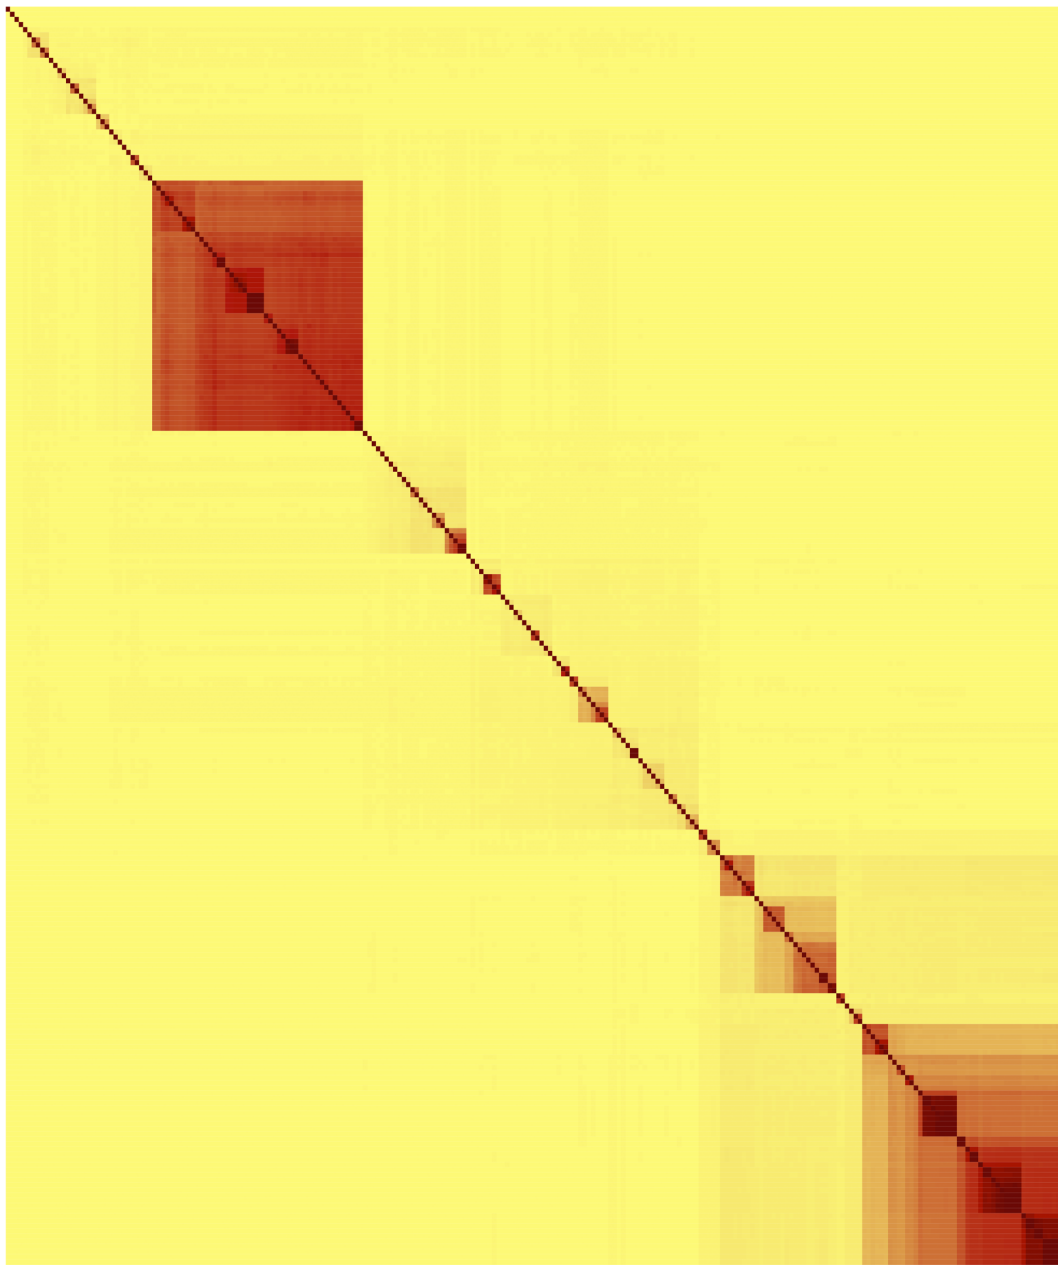

```
00001data N1000  
00002FCV1.1  
00003NK-01  
00004CCDAOS  
00005TSM 1556  
00006VSA 1071  
00007DCT  
00008AFCC 14405 = CCUG 16156  
00009TTC 2543  
00010DSM143  
00011DSM143 = DSMK12  
00012DSM143 = DSMK12  
00013DSM143 = DSMK12  
00014DSM143 = DSMK12  
00015DSM143 = DSMK12  
00016DSM143 = DSMK12  
00017DSM143 = DSMK12  
00018DSM143 = DSMK12  
00019DSM143 = DSMK12  
00020DSM143 = DSMK12  
00021DSM143 = DSMK12  
00022DSM143 = DSMK12  
00023DSM143 = DSMK12  
00024DSM143 = DSMK12  
00025DSM143 = DSMK12  
00026DSM143 = DSMK12  
00027DSM143 = DSMK12  
00028DSM143 = DSMK12  
00029DSM143 = DSMK12  
00030DSM143 = DSMK12  
00031DSM143 = DSMK12  
00032DSM143 = DSMK12  
00033DSM143 = DSMK12  
00034DSM143 = DSMK12  
00035DSM143 = DSMK12  
00036DSM143 = DSMK12  
00037DSM143 = DSMK12  
00038DSM143 = DSMK12  
00039DSM143 = DSMK12  
00040DSM143 = DSMK12  
00041DSM143 = DSMK12  
00042DSM143 = DSMK12  
00043DSM143 = DSMK12  
00044DSM143 = DSMK12  
00045DSM143 = DSMK12  
00046DSM143 = DSMK12  
00047DSM143 = DSMK12  
00048DSM143 = DSMK12  
00049DSM143 = DSMK12  
00050DSM143 = DSMK12  
00051DSM143 = DSMK12  
00052DSM143 = DSMK12  
00053DSM143 = DSMK12  
00054DSM143 = DSMK12  
00055DSM143 = DSMK12  
00056DSM143 = DSMK12  
00057DSM143 = DSMK12  
00058DSM143 = DSMK12  
00059DSM143 = DSMK12  
00060DSM143 = DSMK12  
00061DSM143 = DSMK12  
00062DSM143 = DSMK12  
00063DSM143 = DSMK12  
00064DSM143 = DSMK12  
00065DSM143 = DSMK12  
00066DSM143 = DSMK12  
00067DSM143 = DSMK12  
00068DSM143 = DSMK12  
00069DSM143 = DSMK12  
00070DSM143 = DSMK12  
00071DSM143 = DSMK12  
00072DSM143 = DSMK12  
00073DSM143 = DSMK12  
00074DSM143 = DSMK12  
00075DSM143 = DSMK12  
00076DSM143 = DSMK12  
00077DSM143 = DSMK12  
00078DSM143 = DSMK12  
00079DSM143 = DSMK12  
00080DSM143 = DSMK12  
00081DSM143 = DSMK12  
00082DSM143 = DSMK12  
00083DSM143 = DSMK12  
00084DSM143 = DSMK12  
00085DSM143 = DSMK12  
00086DSM143 = DSMK12  
00087DSM143 = DSMK12  
00088DSM143 = DSMK12  
00089DSM143 = DSMK12  
00090DSM143 = DSMK12  
00091DSM143 = DSMK12  
00092DSM143 = DSMK12  
00093DSM143 = DSMK12  
00094DSM143 = DSMK12  
00095DSM143 = DSMK12  
00096DSM143 = DSMK12  
00097DSM143 = DSMK12  
00098DSM143 = DSMK12  
00099DSM143 = DSMK12  
00100DSM143 = DSMK12  
00101DSM143 = DSMK12  
00102DSM143 = DSMK12  
00103DSM143 = DSMK12  
00104DSM143 = DSMK12  
00105DSM143 = DSMK12  
00106DSM143 = DSMK12  
00107DSM143 = DSMK12  
00108DSM143 = DSMK12  
00109DSM143 = DSMK12  
00110DSM143 = DSMK12  
00111DSM143 = DSMK12  
00112DSM143 = DSMK12  
00113DSM143 = DSMK12  
00114DSM143 = DSMK12  
00115DSM143 = DSMK12  
00116DSM143 = DSMK12  
00117DSM143 = DSMK12  
00118DSM143 = DSMK12  
00119DSM143 = DSMK12  
00120DSM143 = DSMK12  
00121DSM143 = DSMK12  
00122DSM143 = DSMK12  
00123DSM143 = DSMK12  
00124DSM143 = DSMK12  
00125DSM143 = DSMK12  
00126DSM143 = DSMK12  
00127DSM143 = DSMK12  
00128DSM143 = DSMK12  
00129DSM143 = DSMK12  
00130DSM143 = DSMK12  
00131DSM143 = DSMK12  
00132DSM143 = DSMK12  
00133DSM143 = DSMK12  
00134DSM143 = DSMK12  
00135DSM143 = DSMK12  
00136DSM143 = DSMK12  
00137DSM143 = DSMK12  
00138DSM143 = DSMK12  
00139DSM143 = DSMK12  
00140DSM143 = DSMK12  
00141DSM143 = DSMK12  
00142DSM143 = DSMK12  
00143DSM143 = DSMK12  
00144DSM143 = DSMK12  
00145DSM143 = DSMK12  
00146DSM143 = DSMK12  
00147DSM143 = DSMK12  
00148DSM143 = DSMK12  
00149DSM143 = DSMK12  
00150DSM143 = DSMK12  
00151DSM143 = DSMK12  
00152DSM143 = DSMK12  
00153DSM143 = DSMK12  
00154DSM143 = DSMK12  
00155DSM143 = DSMK12  
00156DSM143 = DSMK12  
00157DSM143 = DSMK12  
00158DSM143 = DSMK12  
00159DSM143 = DSMK12  
00160DSM143 = DSMK12  
00161DSM143 = DSMK12  
00162DSM143 = DSMK12  
00163DSM143 = DSMK12  
00164DSM143 = DSMK12  
00165DSM143 = DSMK12  
00166DSM143 = DSMK12  
00167DSM143 = DSMK12  
00168DSM143 = DSMK12  
00169DSM143 = DSMK12  
00170DSM143 = DSMK12  
00171DSM143 = DSMK12  
00172DSM143 = DSMK12  
00173DSM143 = DSMK12  
00174DSM143 = DSMK12  
00175DSM143 = DSMK12  
00176DSM143 = DSMK12  
00177DSM143 = DSMK12  
00178DSM143 = DSMK12  
00179DSM143 = DSMK12  
00180DSM143 = DSMK12  
00181DSM143 = DSMK12  
00182DSM143 = DSMK12  
00183DSM143 = DSMK12  
00184DSM143 = DSMK12  
00185DSM143 = DSMK12  
00186DSM143 = DSMK12  
00187DSM143 = DSMK12  
00188DSM143 = DSMK12  
00189DSM143 = DSMK12  
00190DSM143 = DSMK12  
00191DSM143 = DSMK12  
00192DSM143 = DSMK12  
00193DSM143 = DSMK12  
00194DSM143 = DSMK12  
00195DSM143 = DSMK12  
00196DSM143 = DSMK12  
00197DSM143 = DSMK12  
00198DSM143 = DSMK12  
00199DSM143 = DSMK12  
00200DSM143 = DSMK12
```
