# Supplementary material for: LINflow: a computational pipeline that combines an alignment-free with an alignment-based method to accelerate generation of similarity matrices for prokaryotic genomes
Source: PeerJ journal article supplement (doi:10.7717/peerj.10906), 2021-03-24

# Supplementary Figure 6. Heatmap based on the ANI matrix computed by pyani for data set B.

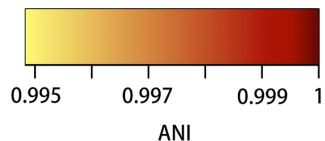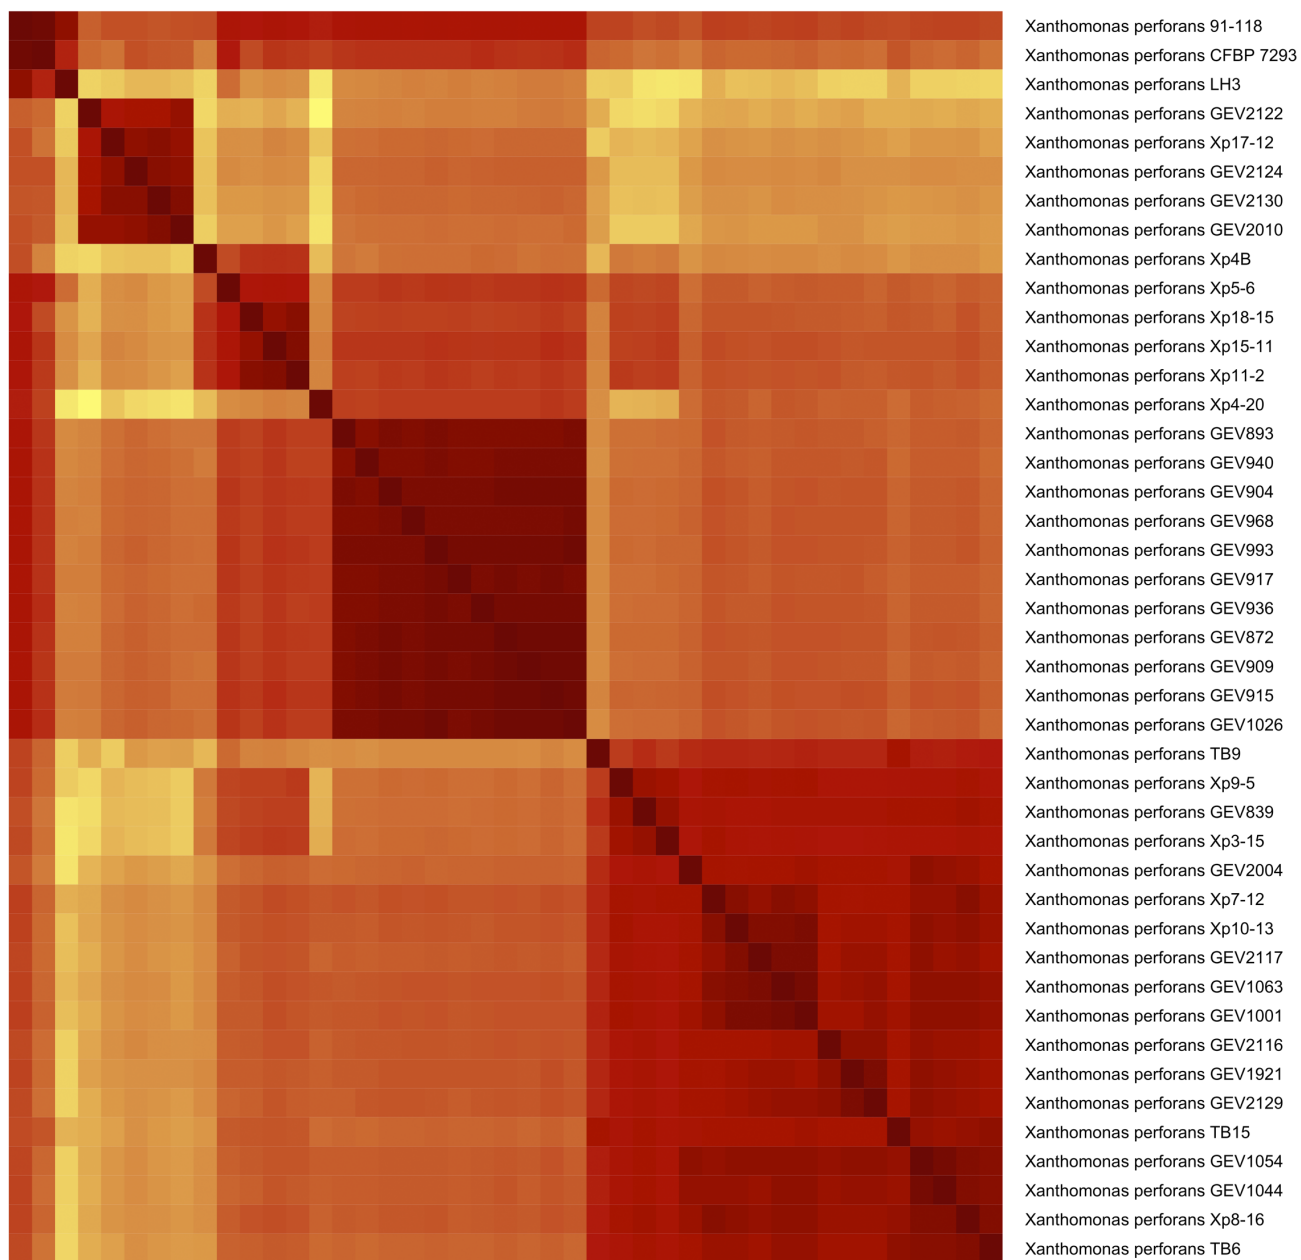

# Supplementary Figure 7. Heatmap based on the ANI matrix calculated by FastANI for data set B.

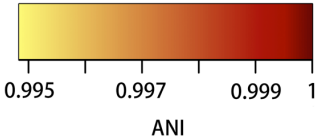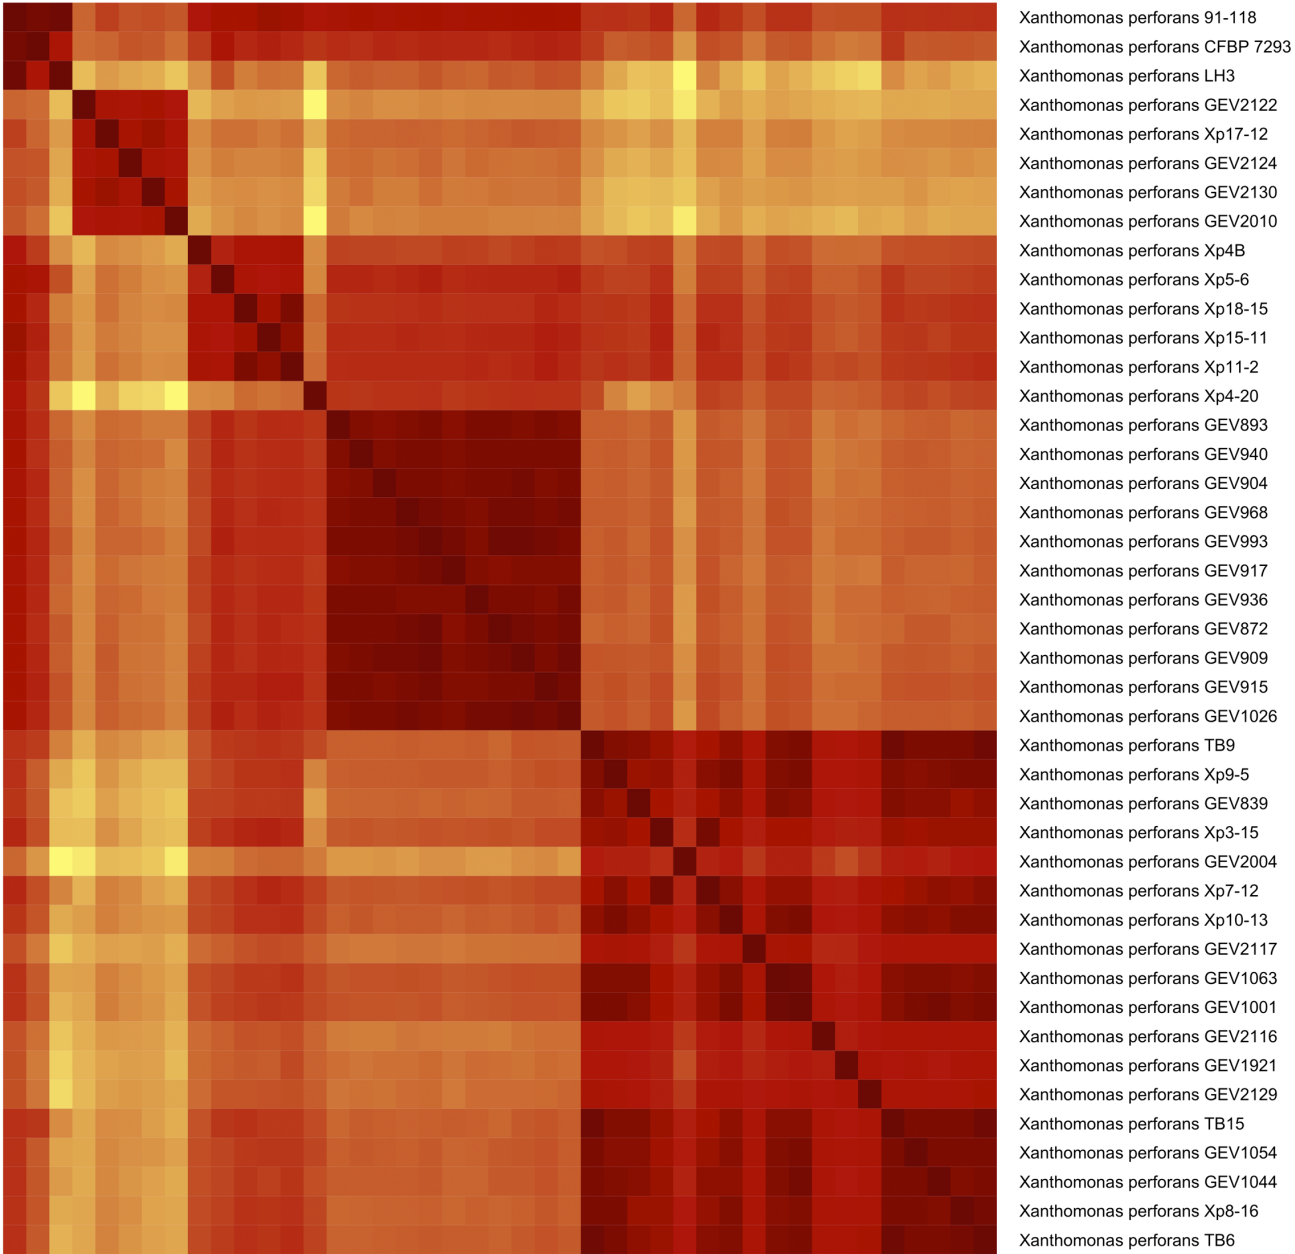

**Supplementary Figure 8.** Heatmap based on the ANI matrix calculated by LINflow for data set B.

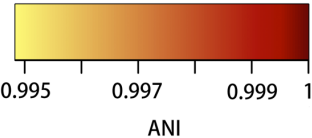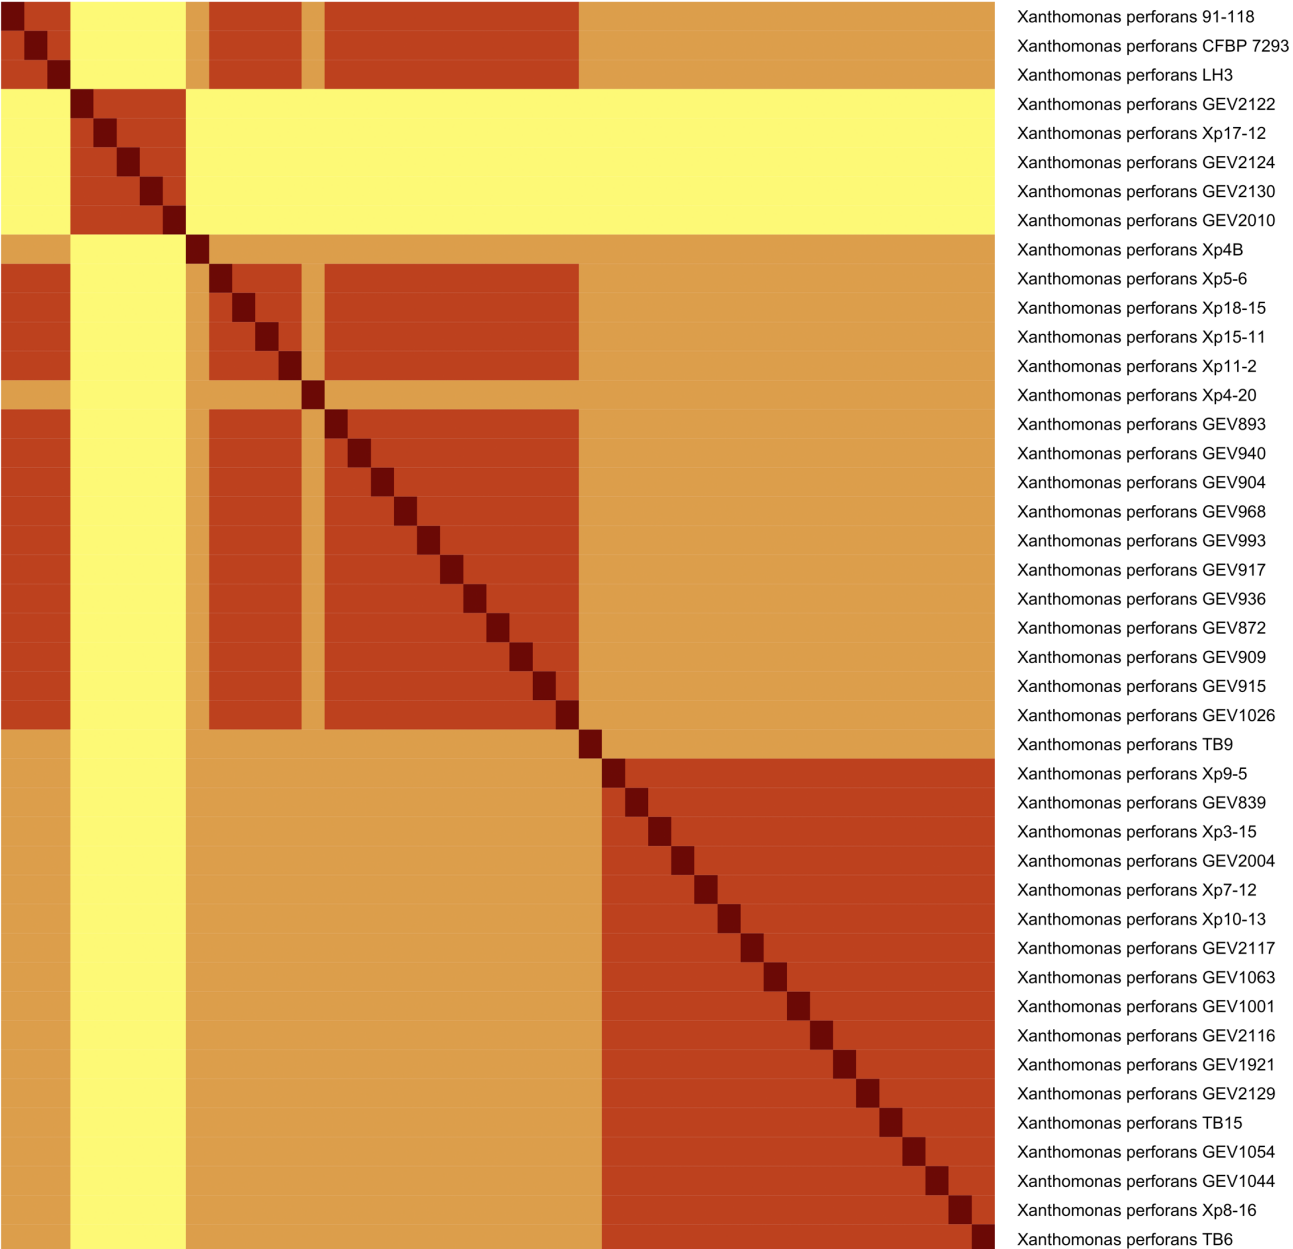

**Supplementary Figure 9.** Heatmap based on the Jaccard similarity matrix calculated by sourmash with k=21 for data set B.

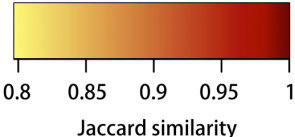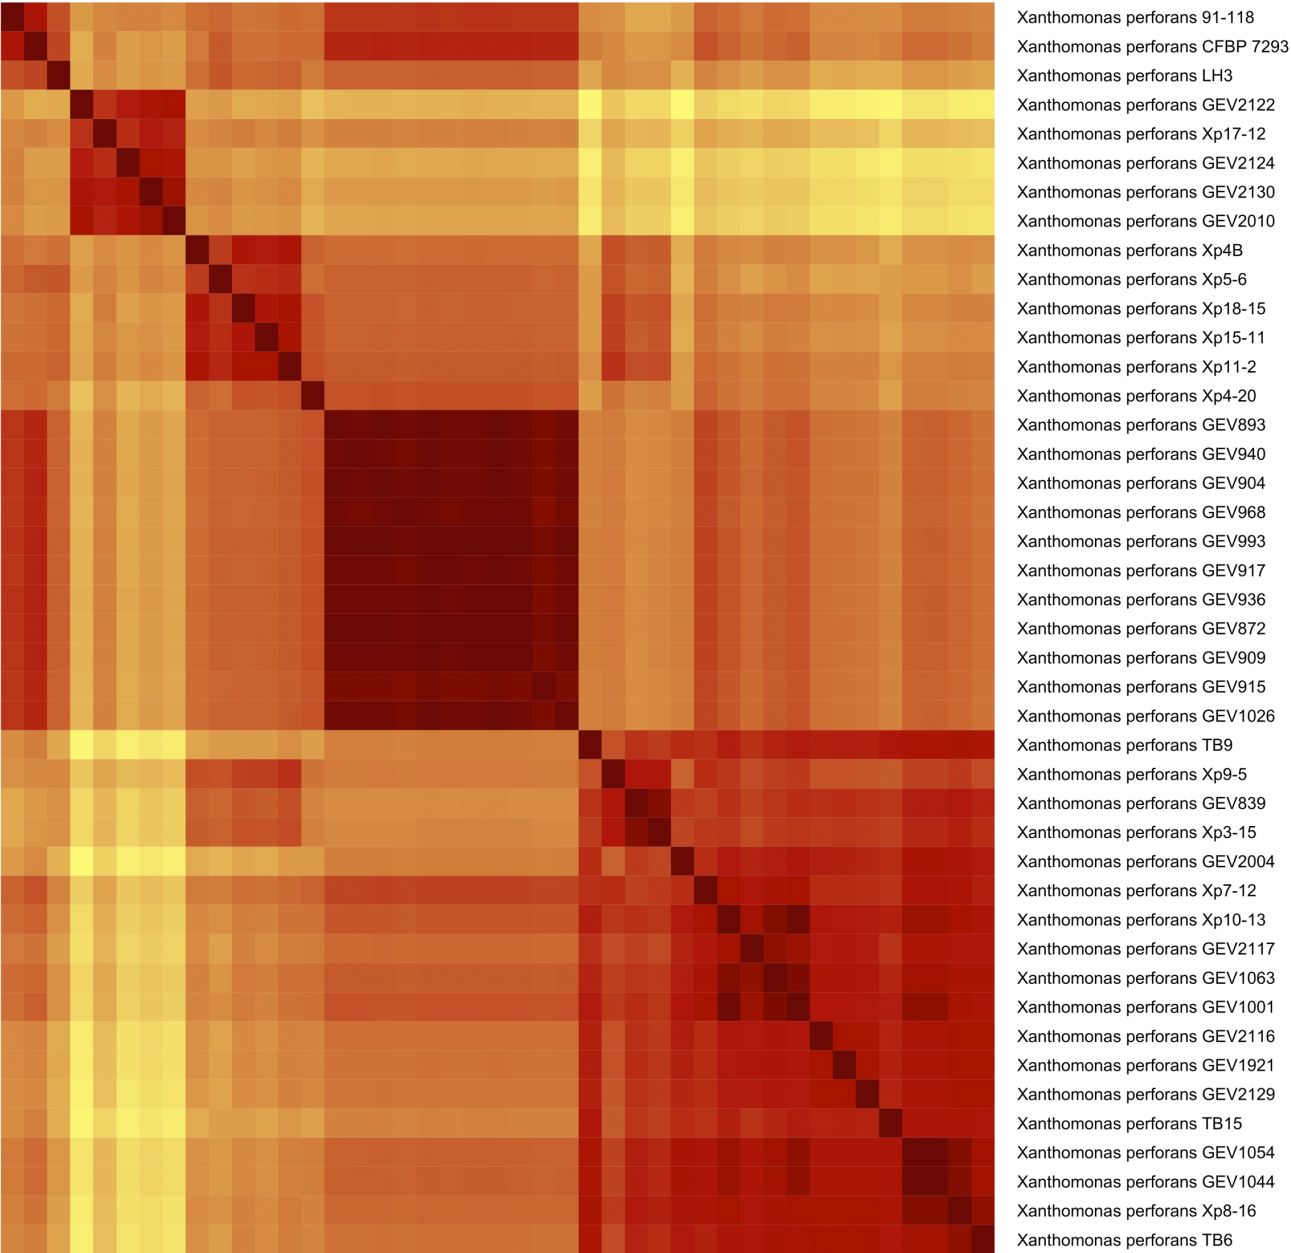



**Supplementary Figure 10.** Heatmap based on the Jaccard similarity matrix calculated by sourmash with k=51 for data set B.

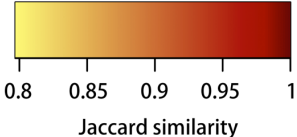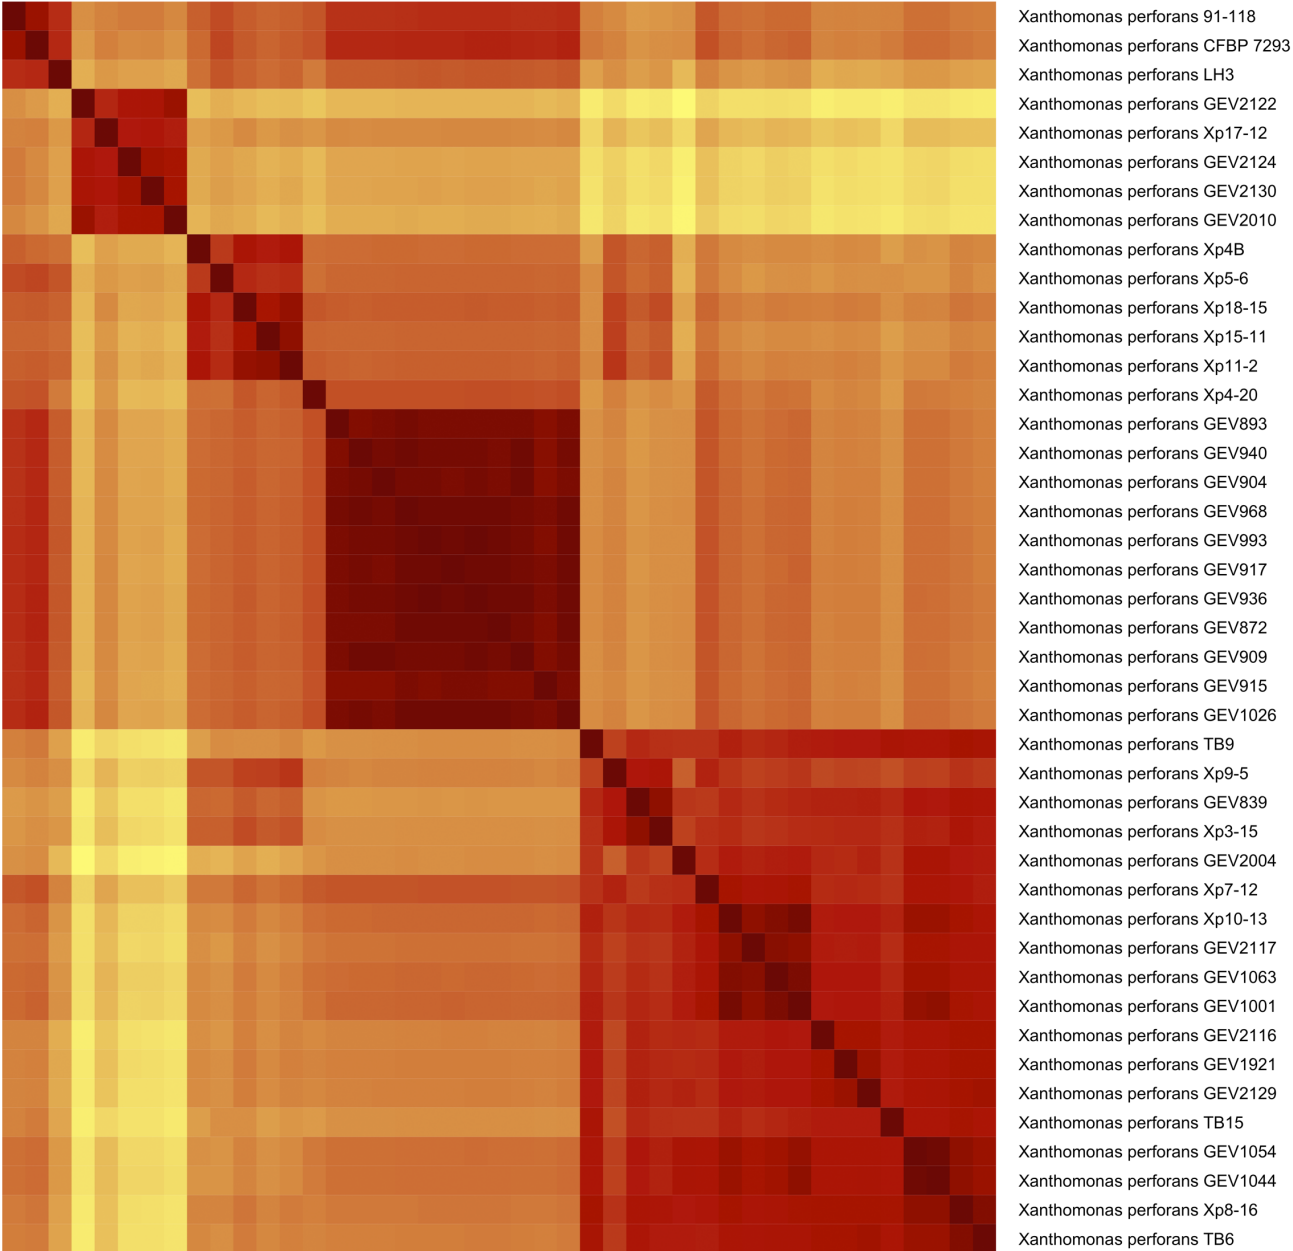

Supplement: Supplementary_Figures_6_through_10.pdf [file Supplementary_Figures_6_through_10.pdf]
