# Supplementary material for: LINflow: a computational pipeline that combines an alignment-free with an alignment-based method to accelerate generation of similarity matrices for prokaryotic genomes
Source: PeerJ journal article supplement (doi:10.7717/peerj.10906), 2021-03-24

**Supplementary Figure 16.** Heatmap based on the ANI matrix calculated by pyani for data set D .

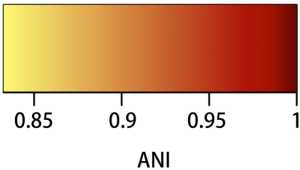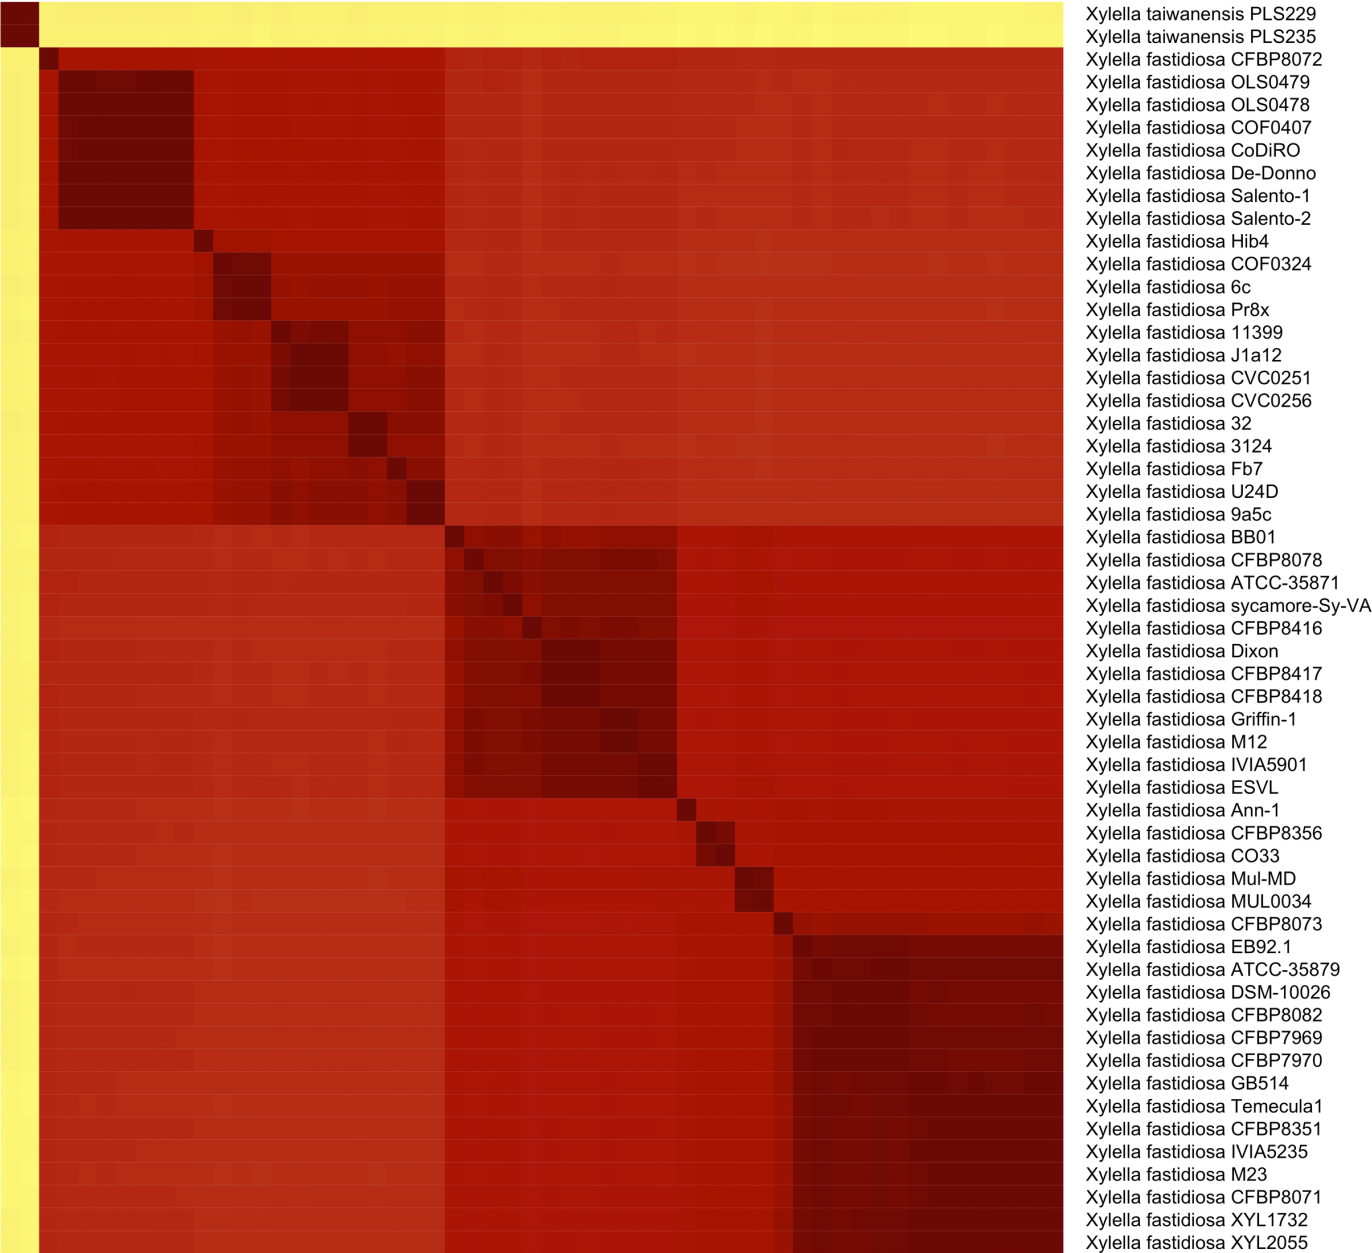

# Supplementary Figure 17. Heatmap based on the ANI matrix calculated by FastANI for data set D.

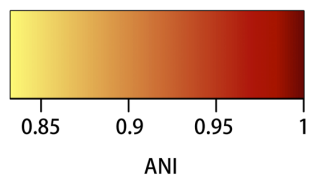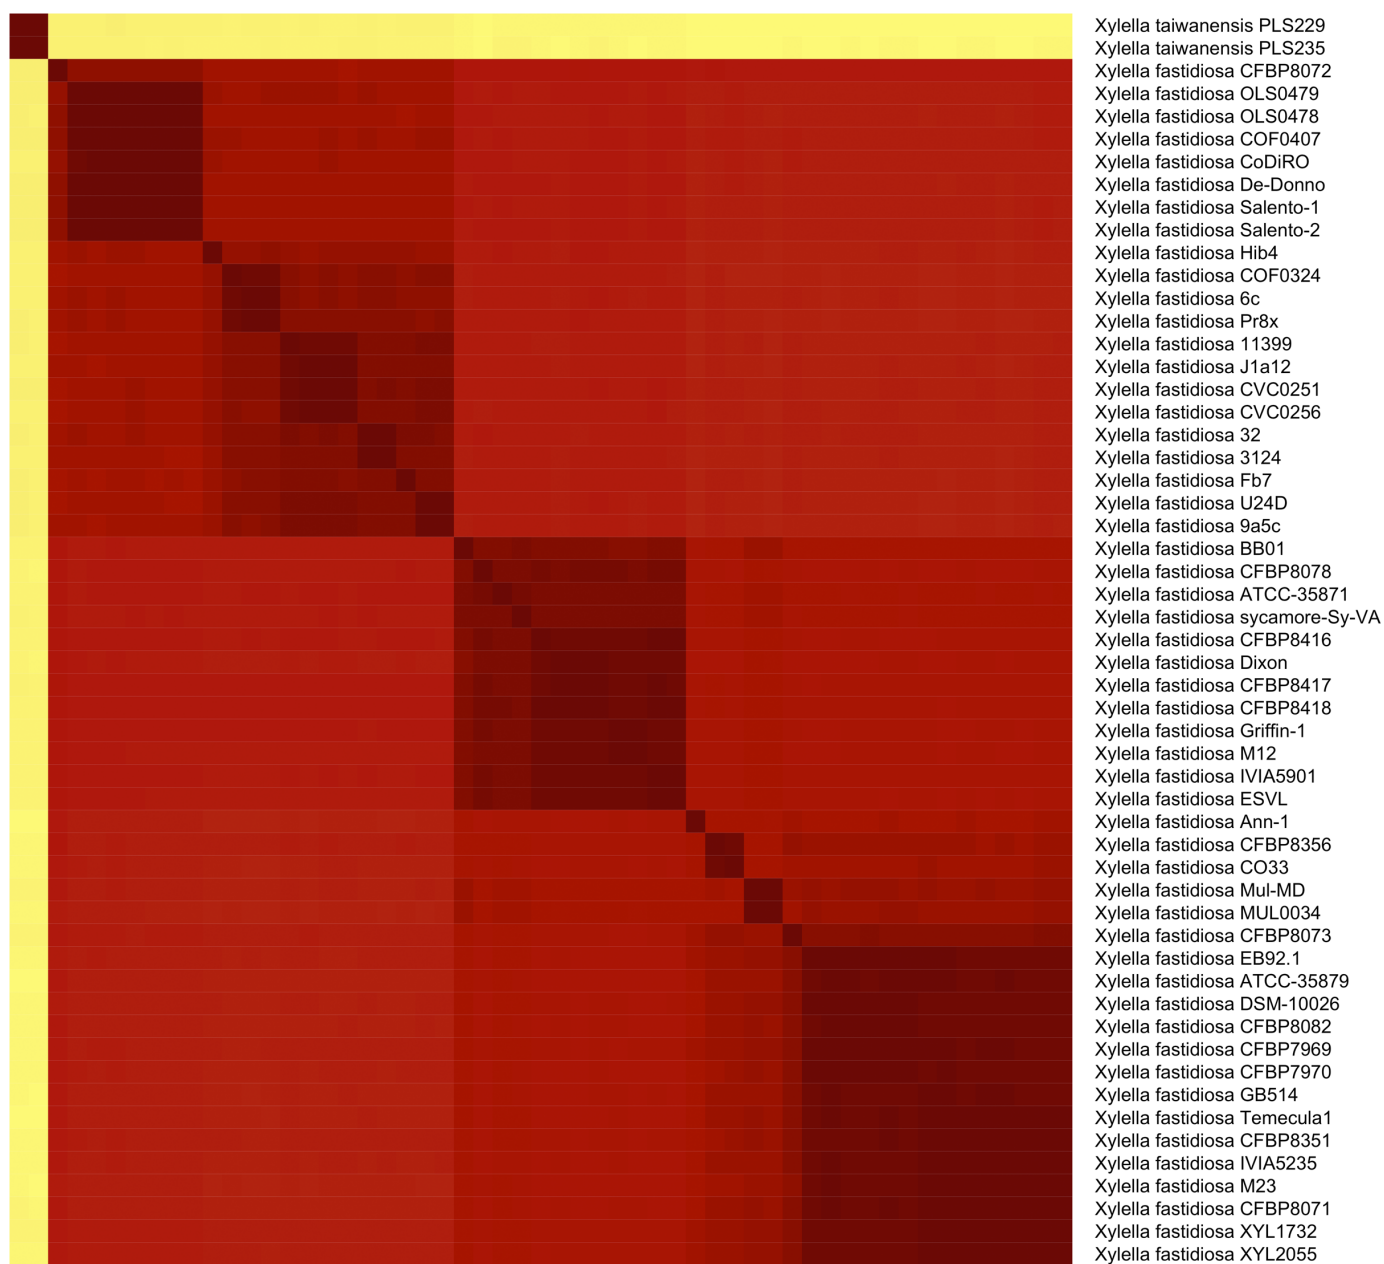

# Supplementary Figure 18. Heatmap based on the ANI matrix calculated by LINflow for data set D.

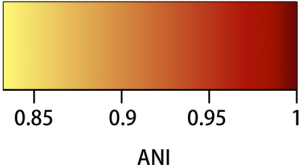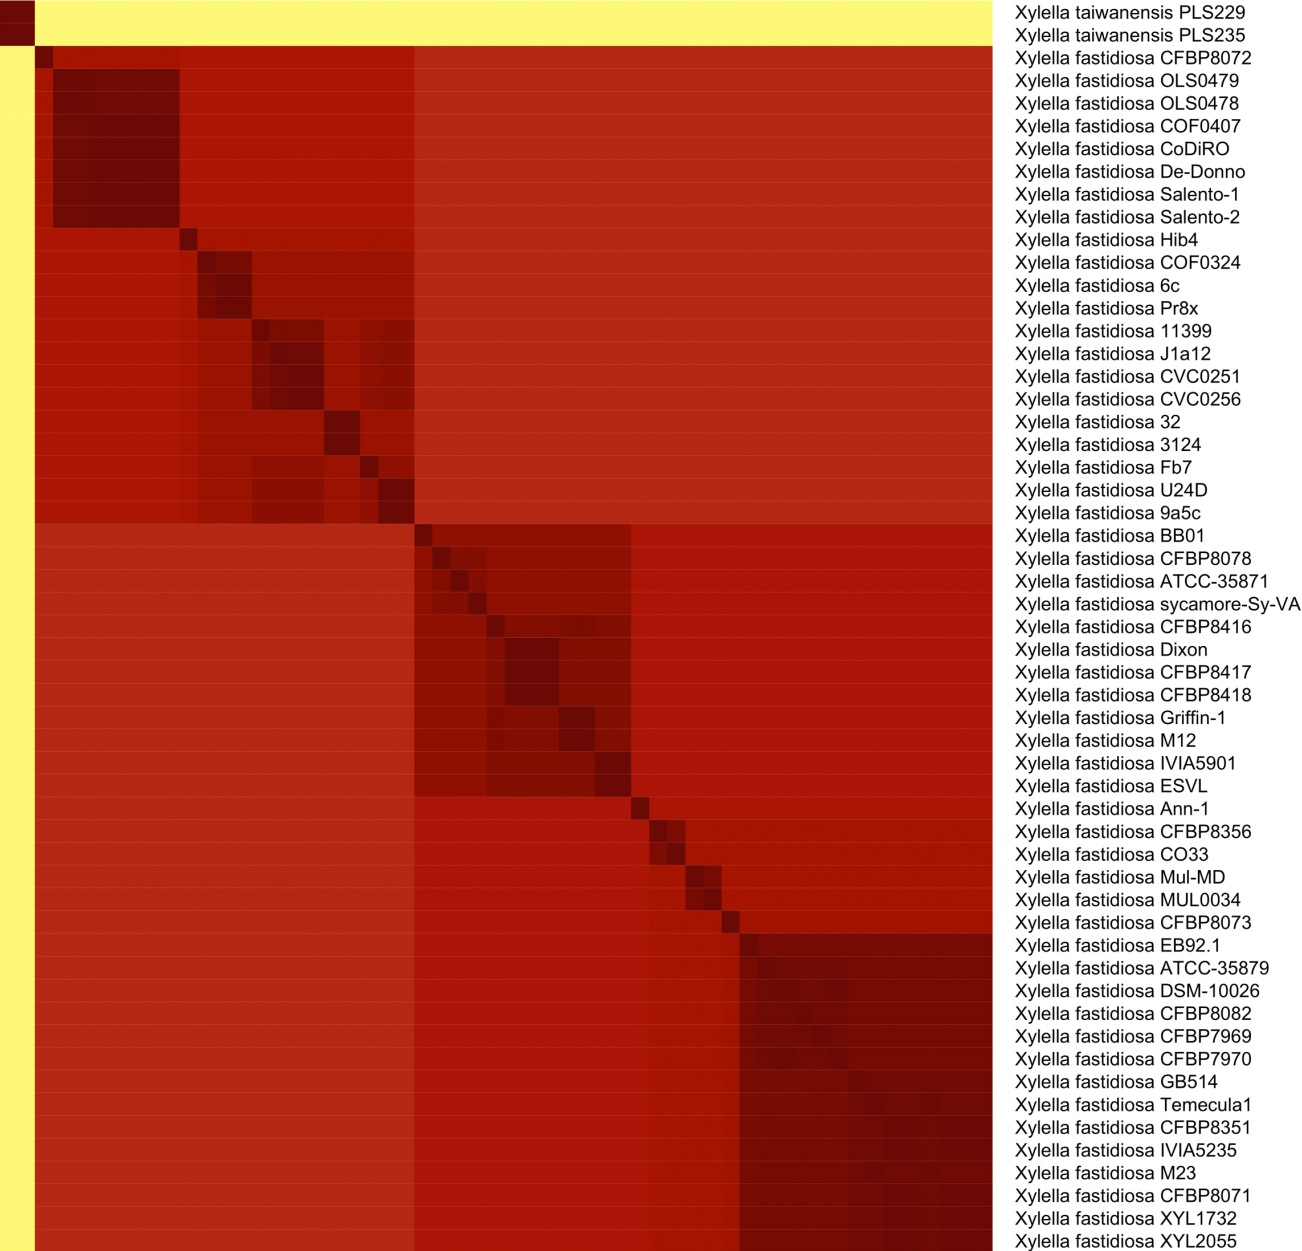

**Supplementary Figure 19.** Heatmap based on the Jaccard similarity matrix calculated by sourmash with k=21 for data set D.

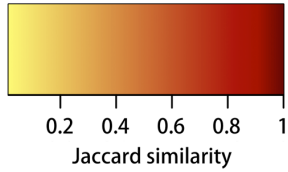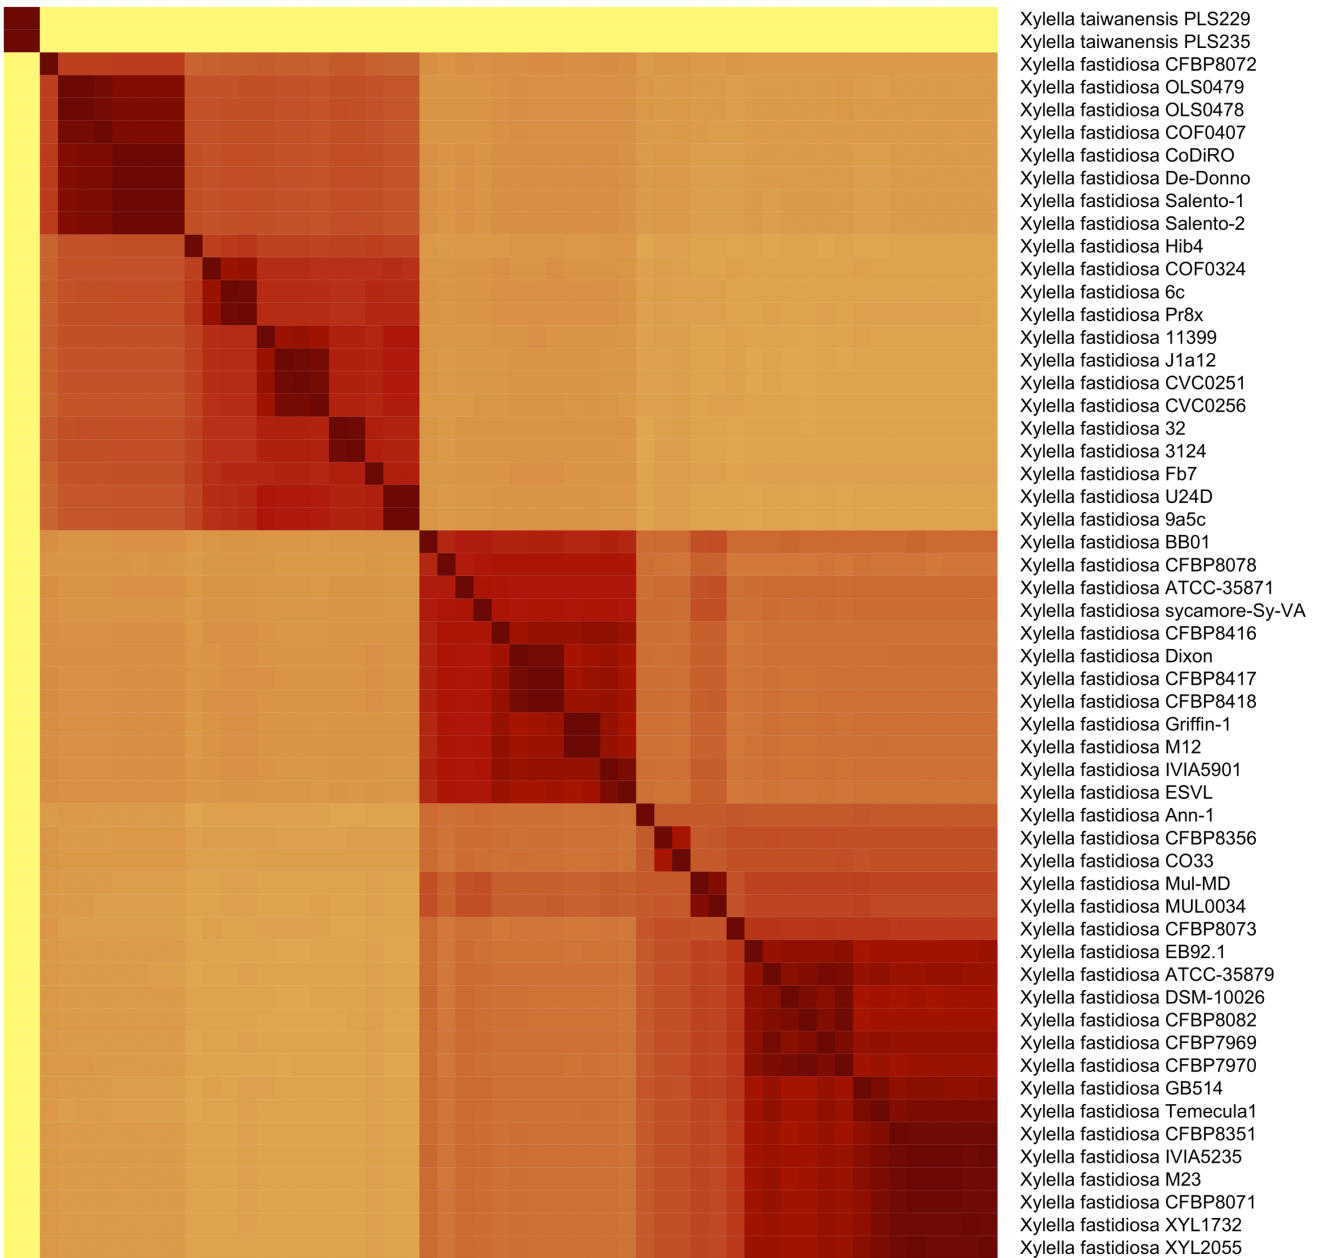



**Supplementary Figure 20.** Heatmap based on the Jaccard similarity matrix calculated by sourmash with k=51 for data set D.

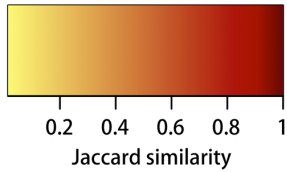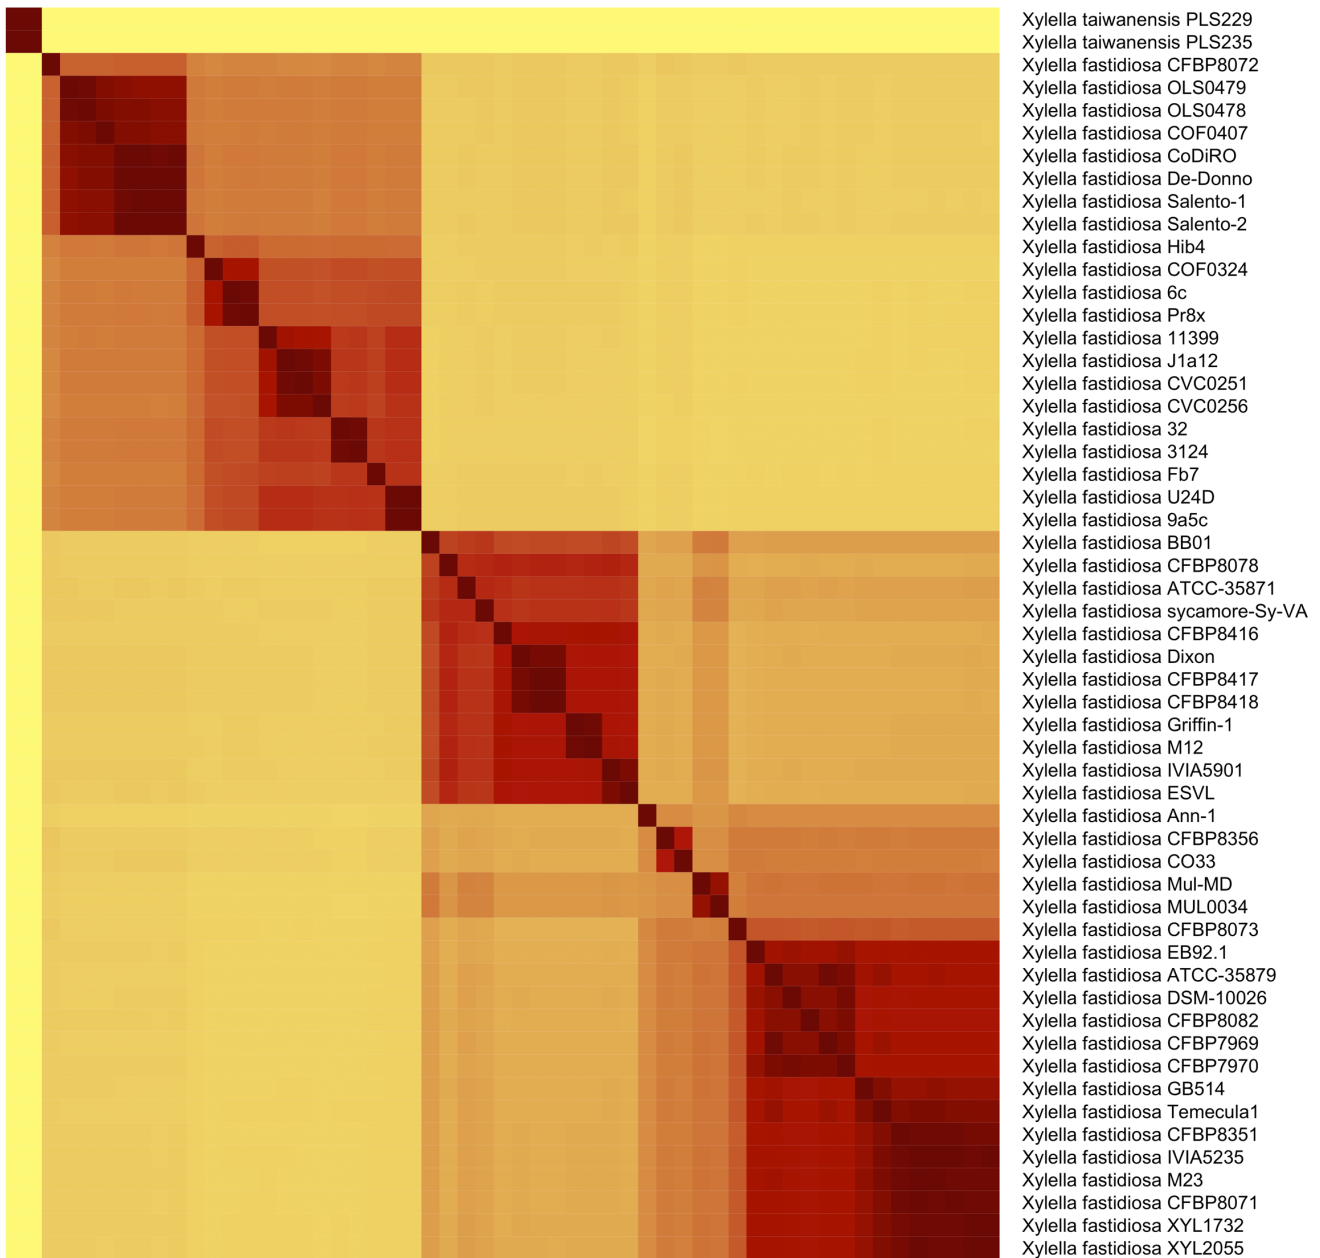

Supplement: Supplementary_Figures_16_through_20.pdf [file Supplementary_Figures_16_through_20.pdf]
